# Supplementary material for: Novel formazan derivatives containing phenylsulfanyl and carbonyl units: synthesis, optical and electrochemical properties
Source: Royal Society of Chemistry journal article supplement (doi:10.1039/c6ra23008c), 2016-01-01

Electronic Supplementary Information (ESI)

**Novel formazan derivatives containing phenylsulfanyl and carbonyl units: Synthesis,  
optical and electrochemical properties**

Gulsen Turkoglu and Halil Berber\*

*Department of Chemistry, Faculty of Science, Anadolu University, 26470 Eskisehir, Turkey*

\*Corresponding author. Tel: +90 222 335 05 80; ext. 4827; fax: +90 222 320 49 10

[hlberber@anadolu.edu.tr](mailto:hlberber@anadolu.edu.tr)

**Table S1** UV-Vis. absorption  $\lambda_{\text{max}}$  values of formazans (**4a–4h**) in various solvents

| Comp.     | DMSO     | DMF      | EtOH     | MeOH     | Acetone | 1,4-Dioxane | EtOAc    |
|-----------|----------|----------|----------|----------|---------|-------------|----------|
| <b>4a</b> | 517      | 515      | 517      | 505      | 504     | 512         | 509      |
|           | 304      | 302      | 304      | 298      |         | 302         | 302      |
| <b>4b</b> | 521      | 512      | 499      | 490      | 498     | 501         | 499      |
|           | 368, 311 | 361, 310 | 285      | 285      | 363     | 310         | 355      |
| <b>4c</b> | 537      | 531      | 522      | 521      | 521     | 525         | 522      |
|           | 304      | 304      | 302      | 302      |         | 303         | 302      |
| <b>4d</b> | 537      | 531      | 526      | 527      | 526     | 527         | 526      |
|           | 306      | 303      | 303      | 415, 304 |         | 303         | 305      |
| <b>4e</b> | 521      | 513      | 501      | 506      | 505     | 506         | 507      |
|           | 303      | 302      | 300      | 301      |         | 302         | 301      |
| <b>4f</b> | 501      | 515      | 523      | 524      | 521     | 530         | 523      |
|           | 378      | 374      | 364, 295 | 514, 362 | 364     | 364, 297    | 364, 295 |
| <b>4g</b> | 515      | 510      | 498      | 499      | 504     | 502         | 503      |
|           | 308      | 309      | 304      | 305      |         | 306         | 304      |
| <b>4h</b> | 409      | 503      | 390      | 389      | 489     | 483         | 484      |
|           |          | 369      | 294      | 289      | 365     | 363         | 365      |

  

| Comp.     | 2-Propanol | CHCl <sub>3</sub> | THF      | 1-Butanol | Toluene | Cyclohexane | n-Hexane |
|-----------|------------|-------------------|----------|-----------|---------|-------------|----------|
| <b>4a</b> | 507        | 510               | 511      | 513       | 524     | 507         | 511      |
|           | 299        | 303               | 302      | 303       | 304     | 405, 301    | 403      |
| <b>4b</b> | 499        | 502               | 507      | 497       | 515     | 495         | 490      |
|           | 285        | 309               | 362      | 286       | 357     | 325, 310    | 361      |
| <b>4c</b> | 522        | 531               | 531      | 528       | 532     | 526         | 520      |
|           | 303        | 307               | 303      | 302       | 306     | 304         | 414      |
| <b>4d</b> | 531        | 530               | 535      | 523       | 536     | 531         | 527      |
|           | 303        | 306               | 305      | 303       | 305     | 419         | 415      |
| <b>4e</b> | 508        | 509               | 514      | 512       | 514     | 511         | 508      |
|           | 302        | 301               | 304      | 301       | 305     | 300         | 406      |
| <b>4f</b> | 522        | 523               | 530      | 528       | 537     | 446         | 442      |
|           | 361, 302   | 374               | 366, 300 | 364, 386  | 366     | 274         | 361, 286 |
| <b>4g</b> | 502        | 503               | 508      | 505       | 509     | 499         | 498      |
|           | 304        | 309               | 308      | 307       | 309     | 405         | 354      |
| <b>4h</b> | 386        | 496               | 494      | 385       | 503     | 439         | 478      |
|           |            | 368               | 365      |           | 367     | 370         | 431      |

**Table S2** UV-vis absorption  $\lambda_{\max}$  values of formazans (**5a–5h**) in different solvents

| Comp.     | DMSO     | DMF      | EtOH     | MeOH     | Acetone | Dioxane  | EtOAc    |
|-----------|----------|----------|----------|----------|---------|----------|----------|
| <b>5a</b> | 505      | 507      | 501 303  | 498      | 502     | 501      | 503      |
|           | 307      | 305      |          | 303      |         | 305      | 304      |
| <b>5b</b> | 513      | 506      | 503      | 500      | 502     | 502      | 500      |
|           | 372, 313 | 368, 313 | 364, 309 | 365, 310 | 365     | 365, 310 | 299, 272 |
| <b>5c</b> | 520      | 517      | 512      | 511      | 515     | 512      | 515      |
|           | 313      | 309      | 307      | 307      |         | 307      | 309      |
| <b>5d</b> | 524      | 520      | 517      | 512      | 526     | 517      | 516      |
|           | 311      | 310      | 307      | 308      | 364     | 308      | 310      |
| <b>5e</b> | 508      | 507      | 501      | 499      | 503     | 502      | 500      |
|           | 307      | 306      | 306      | 305      |         | 305      | 306      |
| <b>5f</b> | 496      | 494      | 533      | 530      | 525     | 540      | 537      |
|           |          |          | 377, 299 | 394, 289 | 372     | 368, 304 | 371, 304 |
| <b>5g</b> | 506      | 506      | 499      | 500      | 498     | 500      | 500      |
|           | 311      | 310      | 309      | 306      | 359     | 311      | 308      |
| <b>5h</b> | 406      | 402      | 388      | 391      | 391     | 386      | 386      |

  

| Comp.     | Propanol | CHCl <sub>3</sub> | THF      | 1-Butanol | Toluene  | Cyclohexane | n-Hexane |
|-----------|----------|-------------------|----------|-----------|----------|-------------|----------|
| <b>5a</b> | 500      | 503               | 506      | 503       | 509      | 505         | 504      |
|           | 300      | 308               | 306      | 303       | 417, 306 | 304         | 302      |
| <b>5b</b> | 503      | 496               | 506      | 504       | 512      | 506         | 502      |
|           | 365, 311 | 364, 314          | 368, 313 | 366, 310  | 367, 312 | 361, 312    | 361, 312 |
| <b>5c</b> | 511 308  | 509               | 520      | 513       | 518      | 516         | 516      |
|           |          | 311               | 310      | 309       | 311      | 412, 309    | 461, 307 |
| <b>5d</b> | 531      | 515 312           | 517      | 519       | 523      | 518         | 517      |
|           | 303      |                   | 310      | 309       | 313      | 417, 310    | 311      |
| <b>5e</b> | 502      | 498               | 504      | 503       | 511 311  | 506         | 503      |
|           | 303      | 309               | 308      | 305       |          | 303         | 426, 306 |
| <b>5f</b> | 534      | 548               | 539      | 538       | 552      | 549         | 568      |
|           | 376, 310 | 372, 304          | 371      | 372, 303  | 367, 306 | 360, 307    | 363      |
| <b>5g</b> | 498      | 499               | 506      | 501       | 503      | 503         | 502      |
|           | 309      | 312               | 311      | 307       | 311      | 308         | 310      |
| <b>5h</b> | 390      | 389               | 391      | 389       | 388      | 379         | 369      |
|           | 303      |                   |          |           |          |             |          |

**Table S3.** Calculated sum of electronic and thermal free energies (SETFE) (in Hartree) of compounds **4a-4h** and **5a-5h** and some important bond distances of tautomer forms predicted at PBE1PBE/6-311g(2d,2p) level (in Å) in gas phase.

| Comp.     | SETFE      |            | $\Delta_{KT}^a$ | H-bond (Å)        |         |         |                   |         |         |
|-----------|------------|------------|-----------------|-------------------|---------|---------|-------------------|---------|---------|
|           | Tautomer 1 | Tautomer 2 |                 | Tautomeric form 1 |         |         | Tautomeric form 2 |         |         |
|           |            |            |                 | H1...N2           | H1...S1 | H1...O1 | H2...N1           | H2...S1 | H2...O1 |
| <b>4a</b> | -1694.6068 | -1694.6026 | 0.004           | 1.788             | 3.051   | -       | 1.840             | 2.670   |         |
| <b>4b</b> | -1809.0035 | -1809.0067 | -0.003          | 1.772             | 3.045   | -       | 1.842             | 2.671   |         |
| <b>4c</b> | -2154.0435 | -2154.0459 | -0.002          | 1.683             | 2.931   | -       | 1.835             | 2.664   |         |
| <b>4d</b> | -4267.7524 | -4267.7536 | -0.001          | 1.784             | 3.042   | -       | 1.837             | 2.665   |         |
| <b>4e</b> | -1793.7951 | -1793.7945 | 0.001           | 1.782             | 3.045   | -       | 1.840             | 2.666   |         |
| <b>4f</b> | -1898.9917 | -1898.9912 | 0.001           | 1.804             | 3.038   | -       | 1.825             | 2.662   |         |
| <b>4g</b> | -1773.0942 | -1773.1009 | -0.007          | 1.783             | 3.055   | -       | 1.732             | 2.668   |         |
| <b>4h</b> | -2103.3694 | -2103.3611 | 0.008           | 1.940             | 3.543   | 1.928   | 1.789             | 4.321   | 2.135   |
| <b>5a</b> | -1869.251  | -1869.246  | 0.005           | 1.850             | -       | 2.313   | 1.799             | -       | 3.480   |
| <b>5b</b> | -1983.646  | -1983.648  | -0.002          | 1.832             | -       | 2.297   | 1.807             | -       | 3.491   |
| <b>5c</b> | -2328.690  | -2328.688  | 0.002           | 1.852             | -       | 2.273   | 1.789             | -       | 3.367   |
| <b>5d</b> | -4442.355  | -4442.396  | -0.041          | 1.855             | -       | 2.365   | 1.795             | -       | 3.398   |
| <b>5e</b> | -1968.437  | -1968.437  | 0.000           | 1.749             | -       | 2.139   | 1.791             | -       | 3.352   |
| <b>5f</b> | -2073.629  | -2073.637  | -0.008          | 1.783             | -       | 2.132   | 1.917             | -       | 1.982   |
| <b>5g</b> | -1949.383  | -1947.647  | 1.736           | 1.845             | -       | 2.298   | 1.796             | -       | 3.459   |
| <b>5h</b> | -2278.007  | -2278.010  | -0.002          | 1.885             | -       | 2.221   | 1.899             | -       | 1.972   |

<sup>a</sup>  $\Delta_{KT} = E_{\text{tautomer form 2}} - E_{\text{tautomer form 1}}$ ,  $\Delta_{KT}$  constant stable between tautomer forms.

Comp.

HOMO (eV)

LUMO (eV)

4a

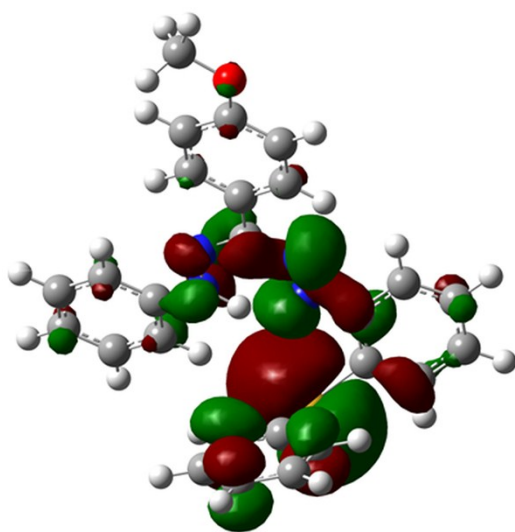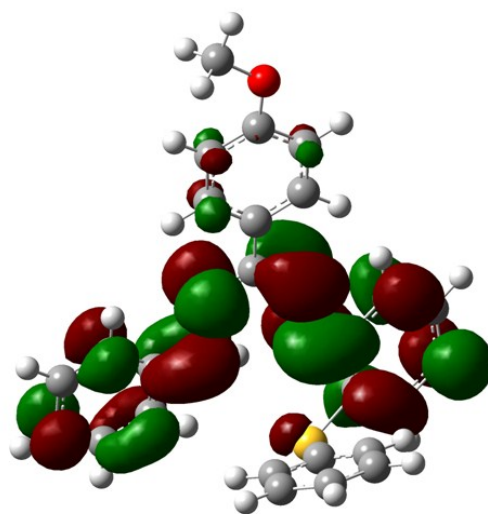

4b

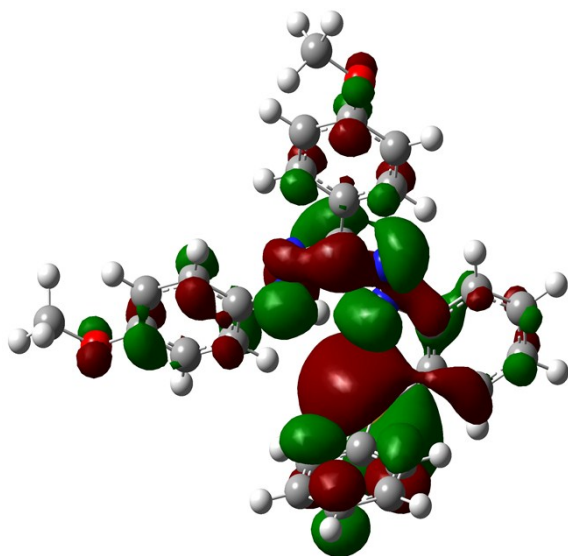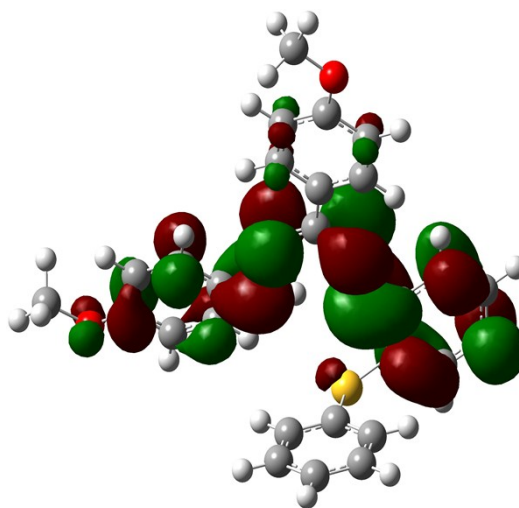

4c

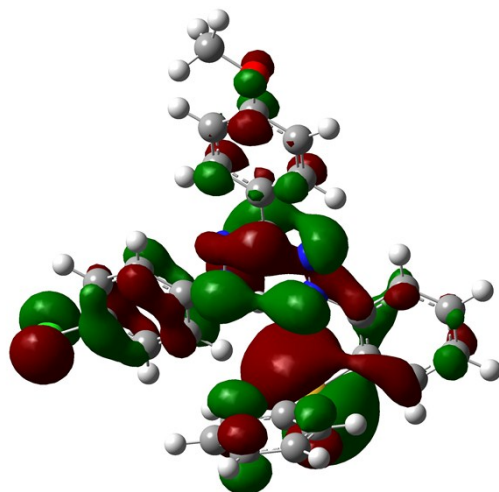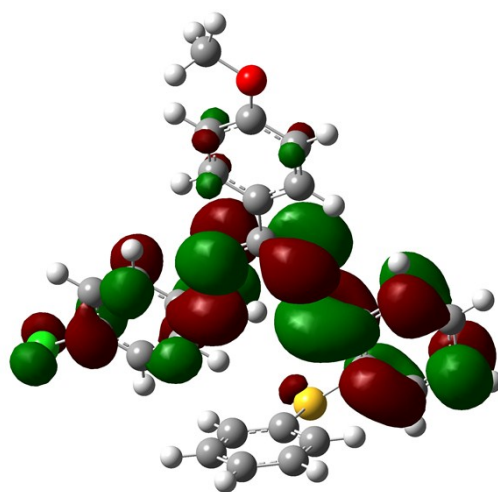

4d

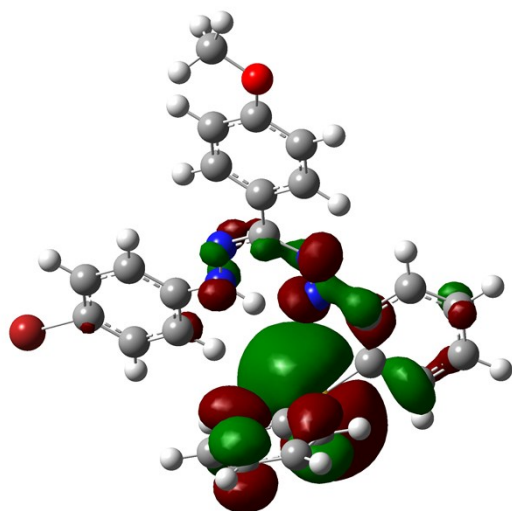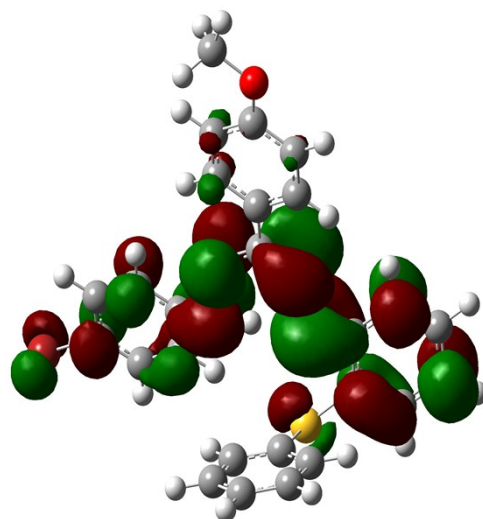

4e

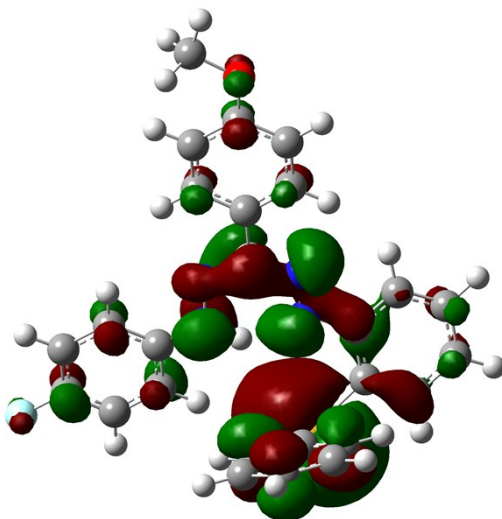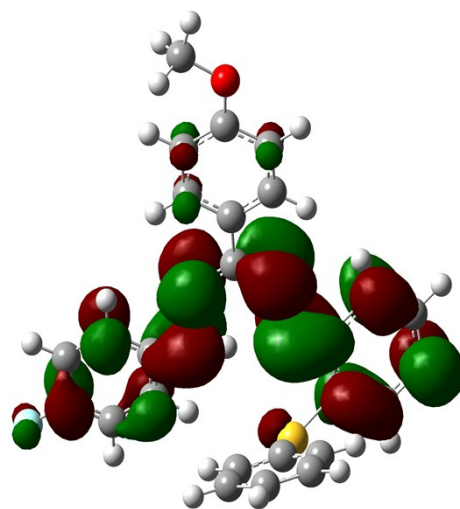

4f

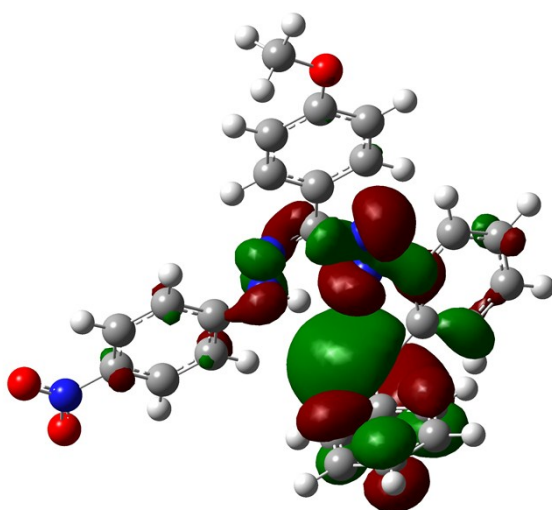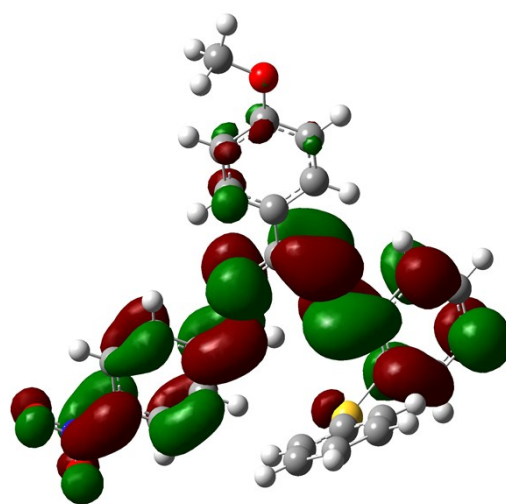

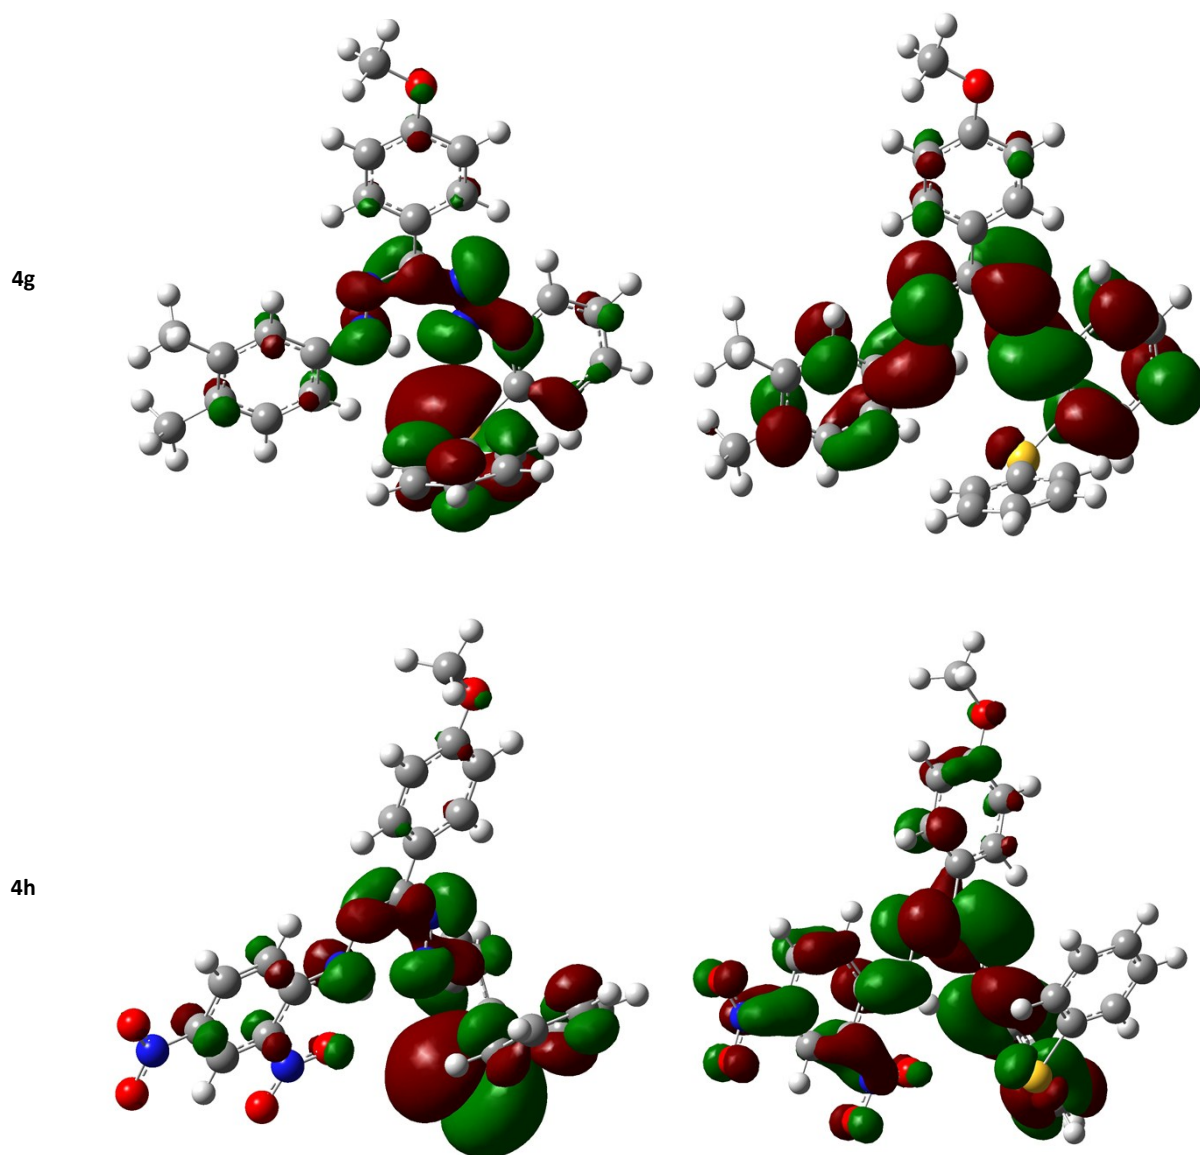

Figure S1 HOMO and LUMO electronic density distributions of **4a–4h** calculated at PBE1PBE/6-311g (2d,2p) level

Comp.

HOMO (eV)

LUMO (eV)

5a

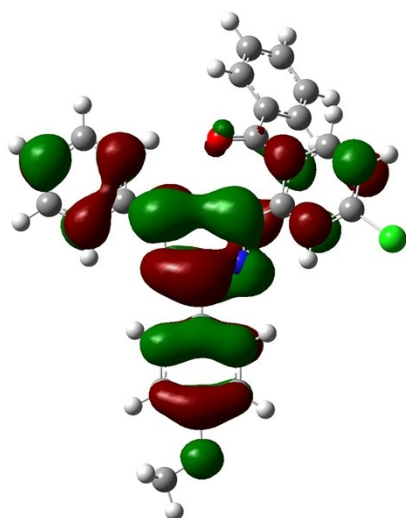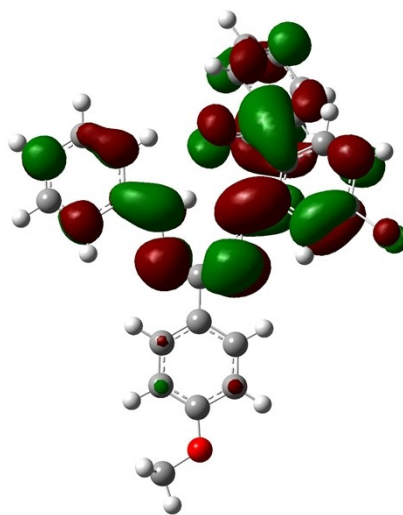

5b

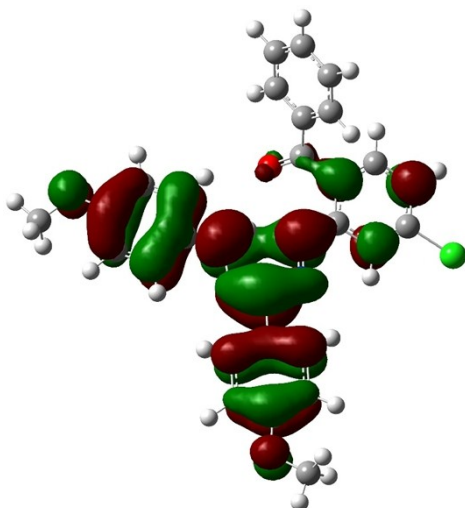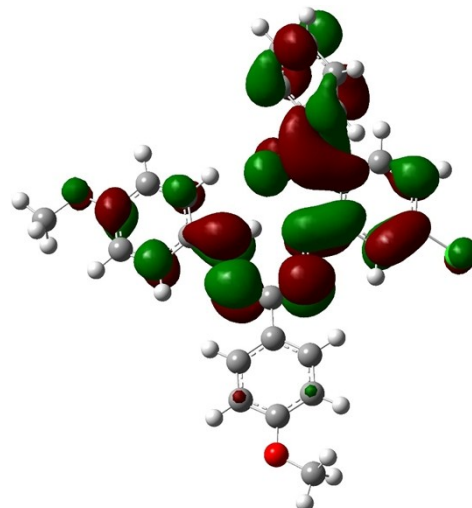

5c

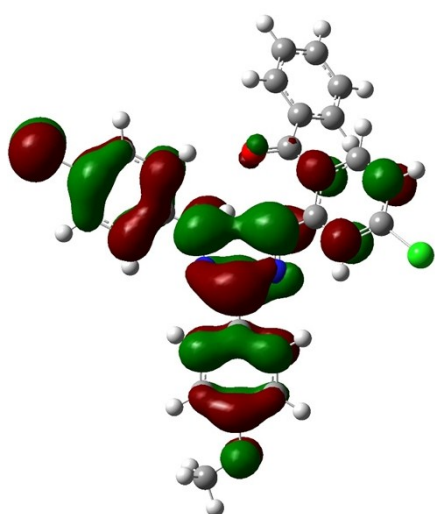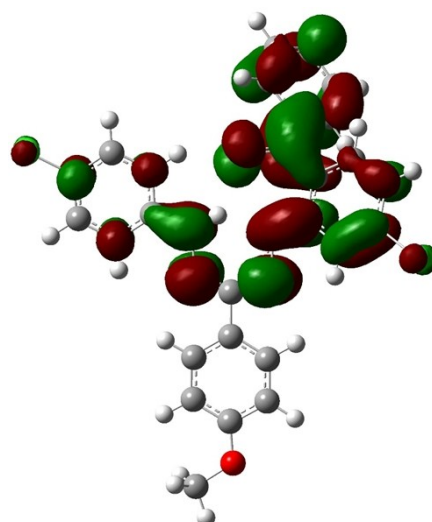



5d

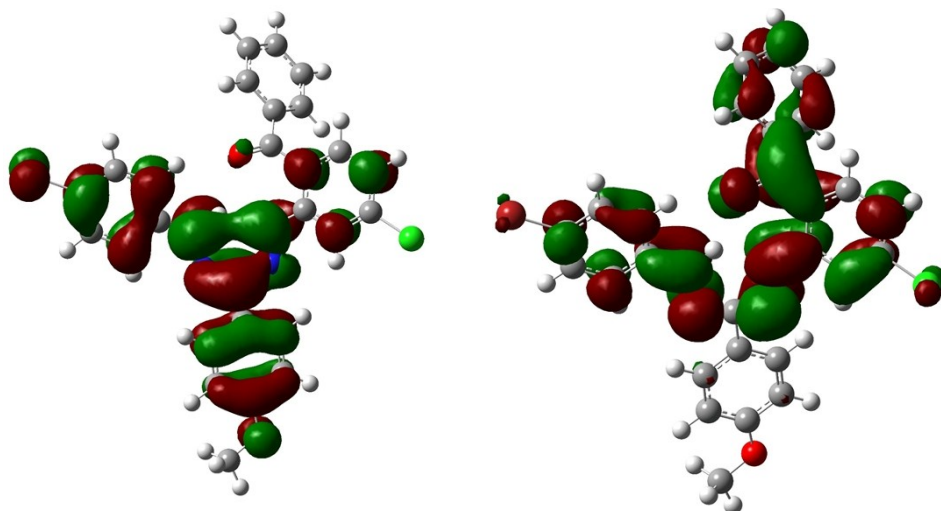

5e

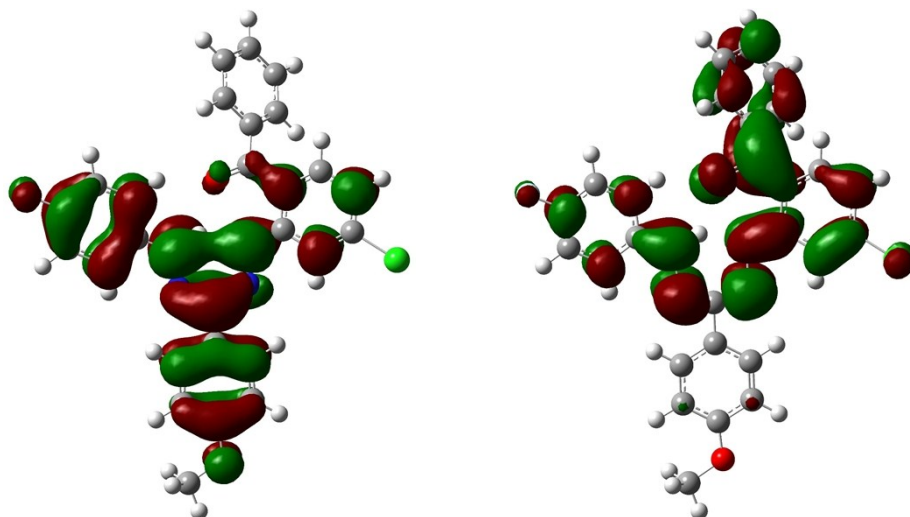

5f

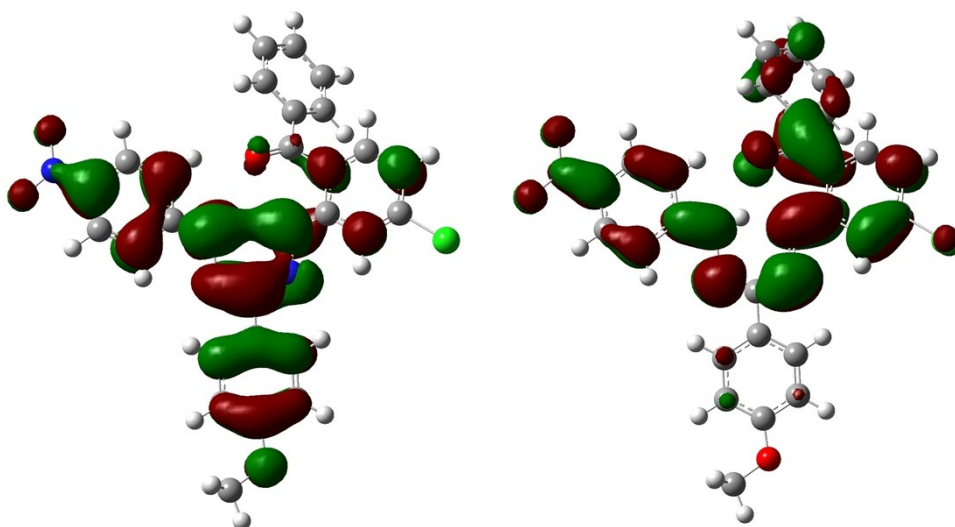

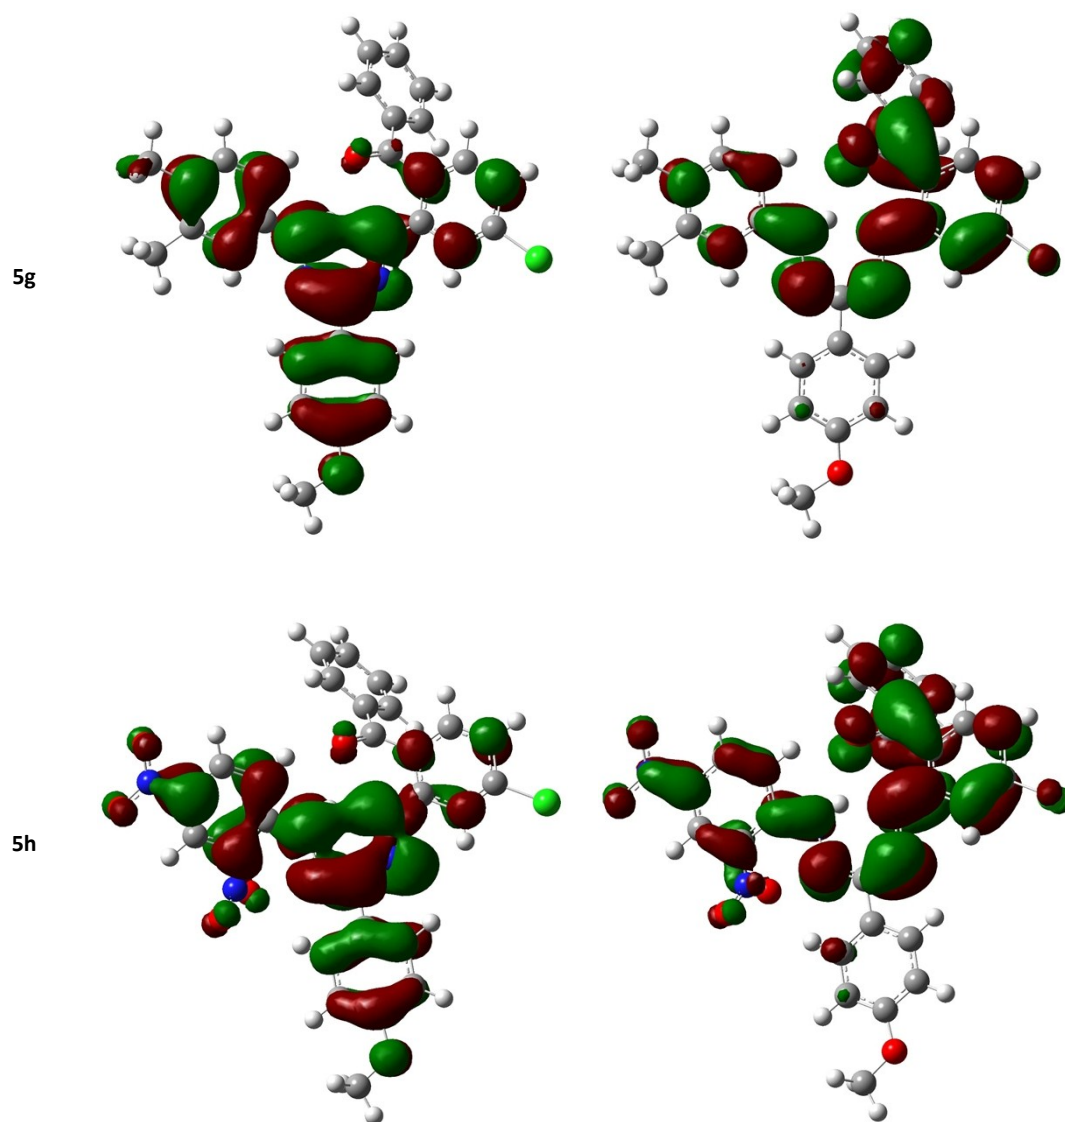

Figure S2 HOMO and LUMO electronic density distributions of **5a–5h** calculated at PBE1PBE/6-311g (2d,2p) level

## NMR spectra of target compounds

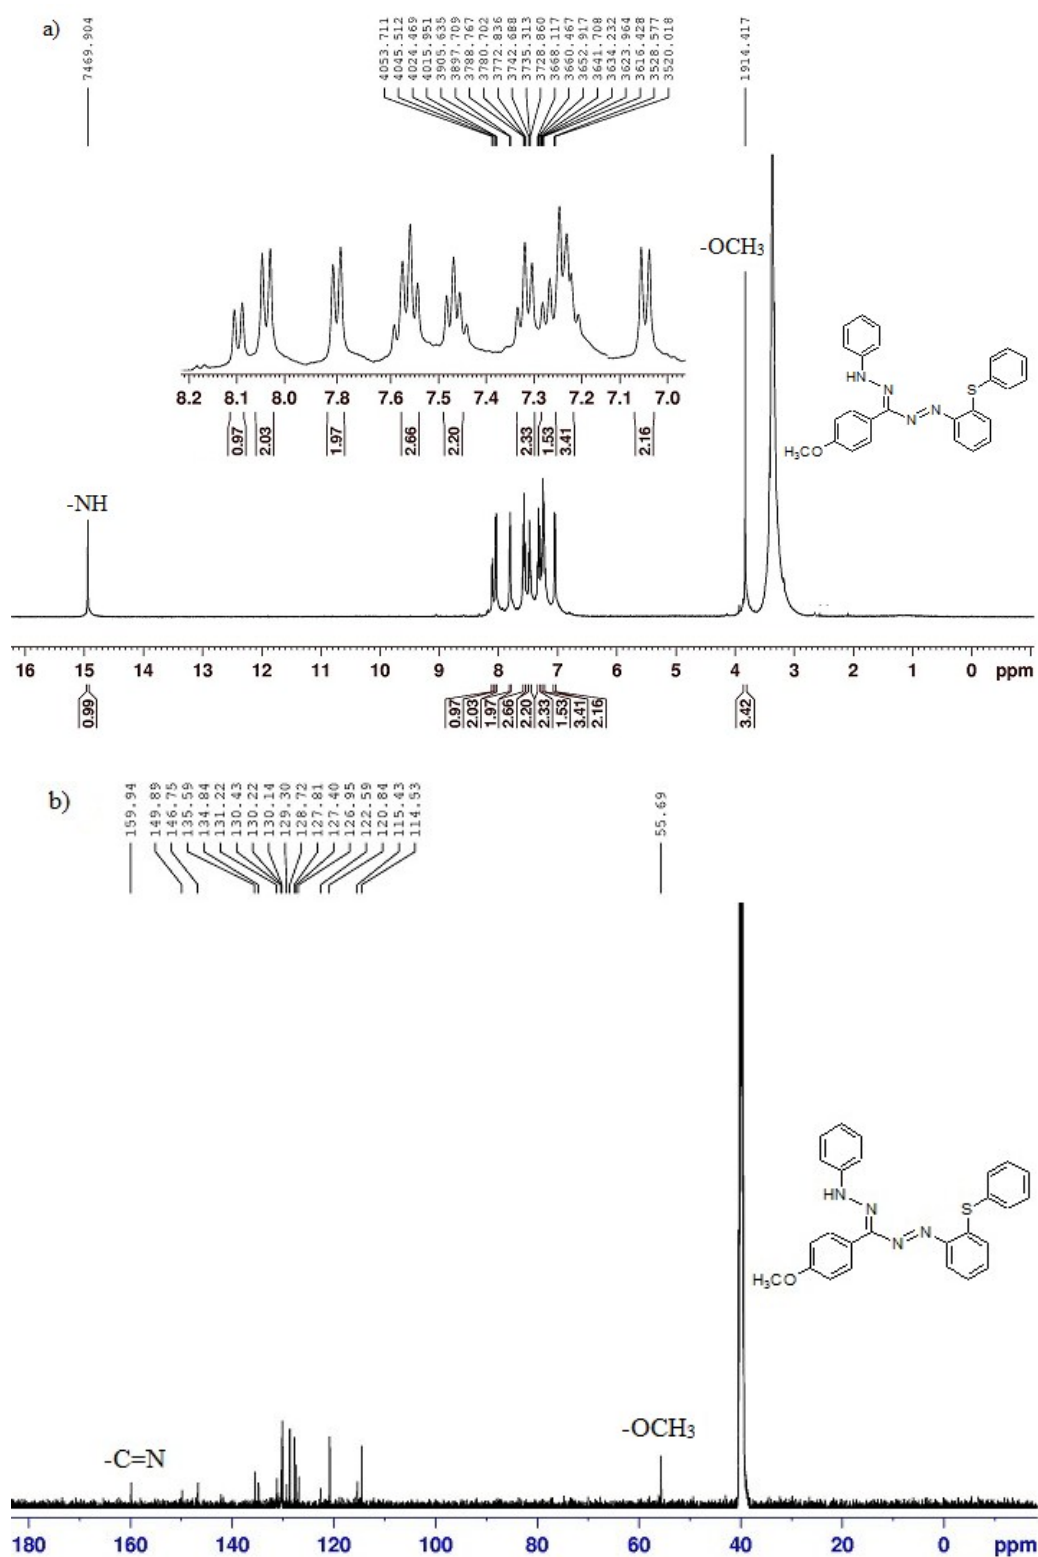Figure S3 a) <sup>1</sup>H NMR (500 MHz, DMSO-d<sub>6</sub>), b) <sup>13</sup>C NMR (126 MHz, DMSO-d<sub>6</sub>) spectra of compound **4a**

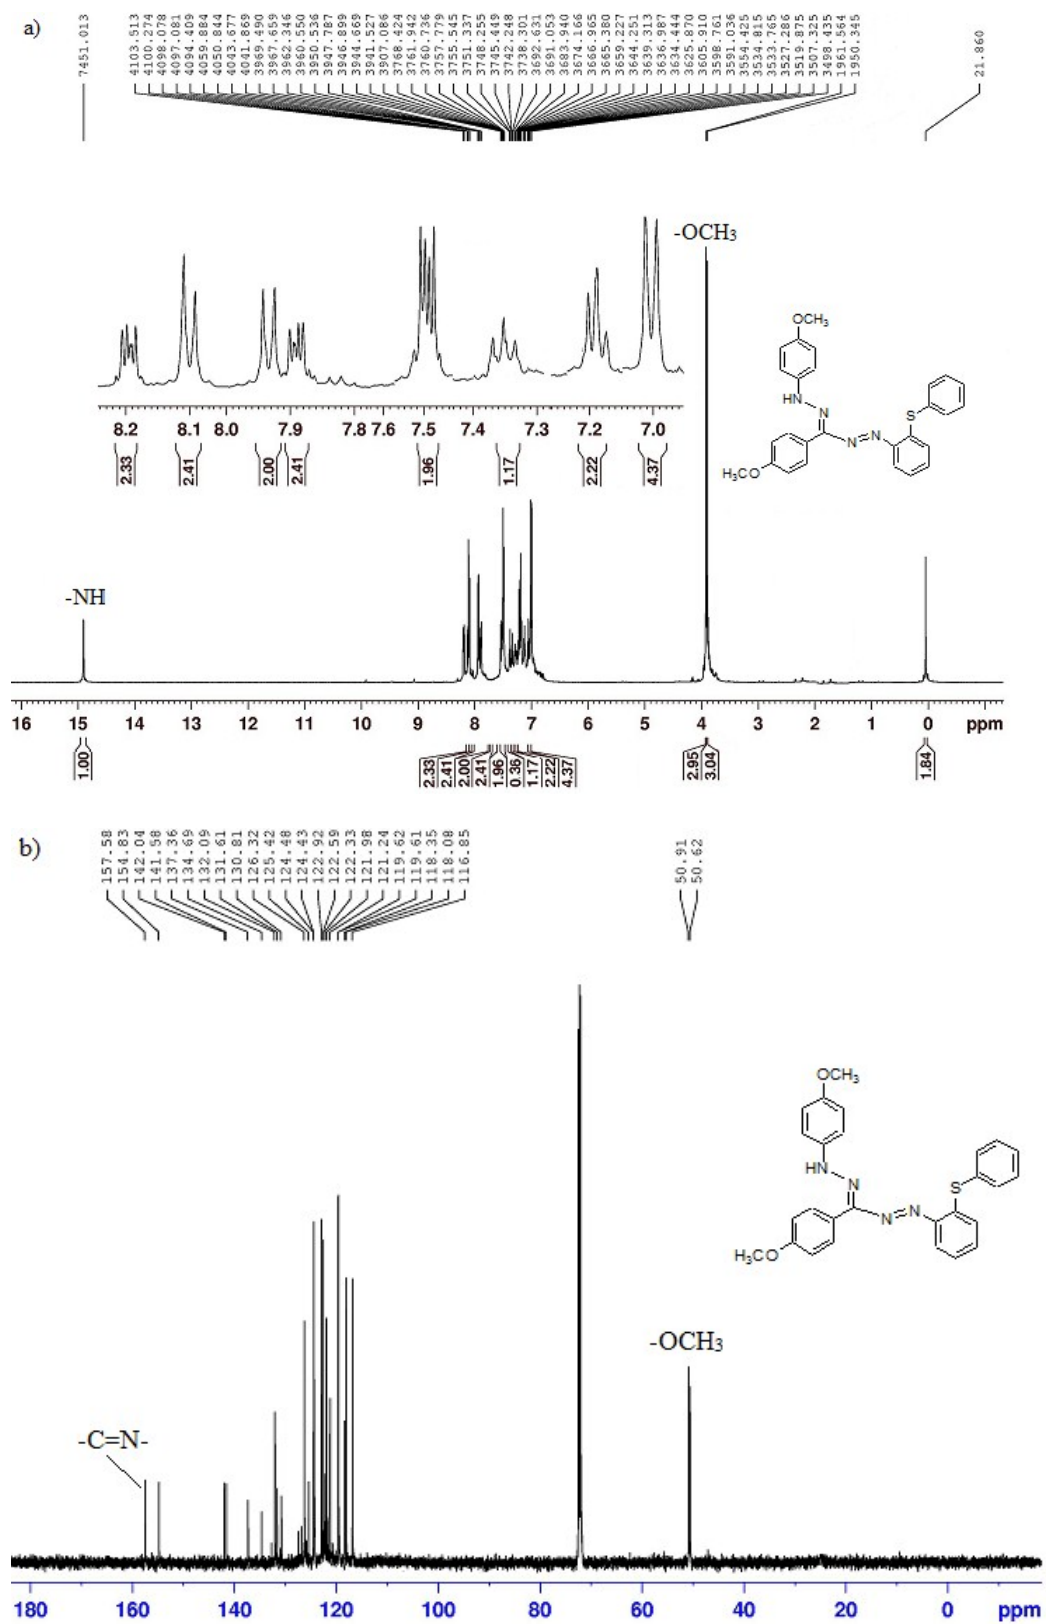

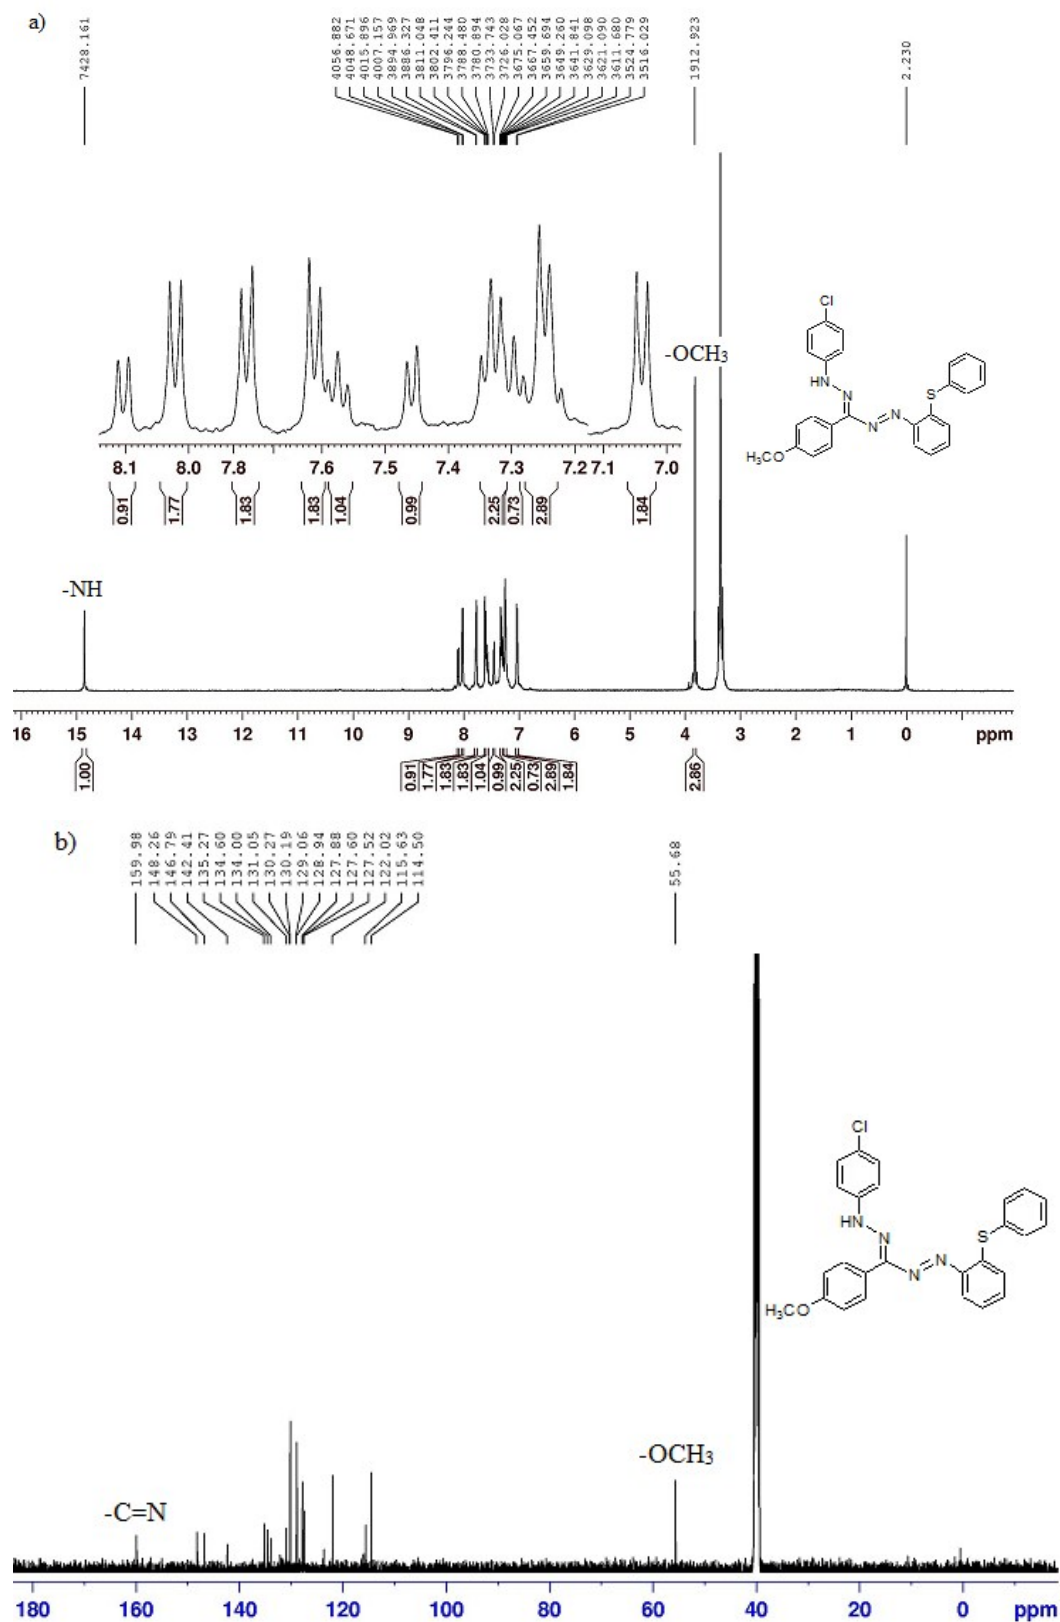

Figure S5 a) <sup>1</sup>H NMR (500 MHz, DMSO-d<sub>6</sub>), b) <sup>13</sup>C NMR (126 MHz, DMSO-d<sub>6</sub>) spectra of compound 4c

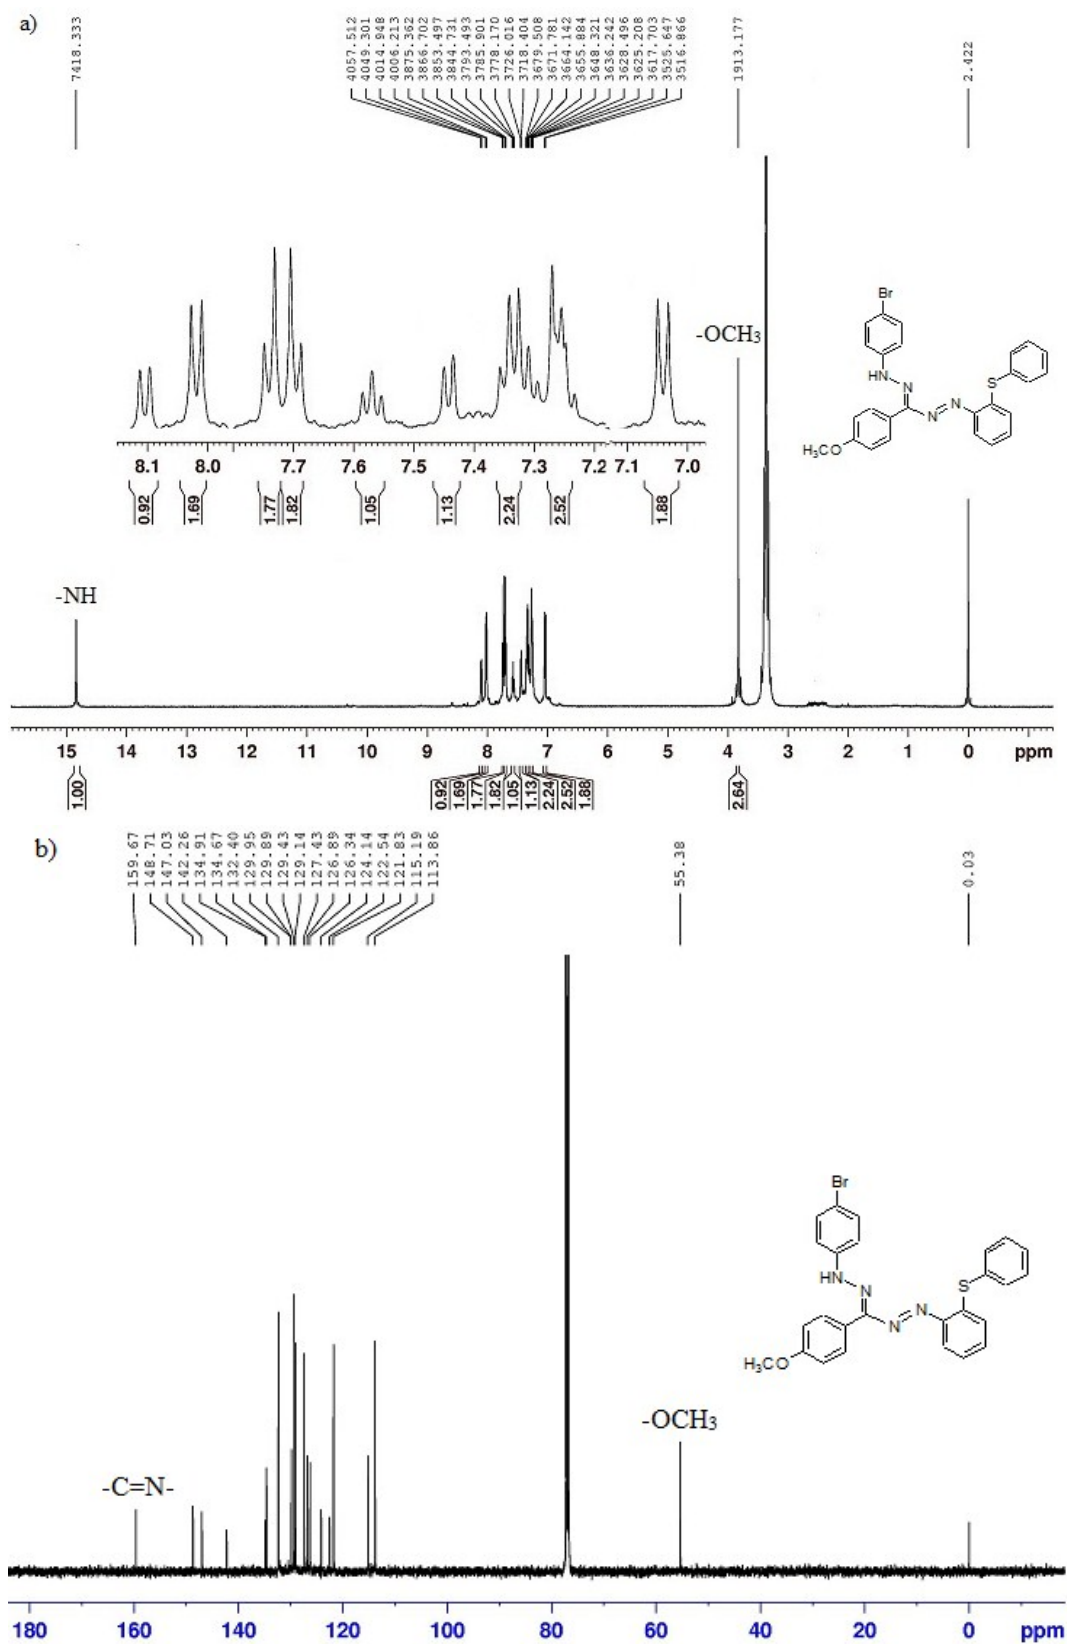

Figure S6 a) <sup>1</sup>H NMR (500 MHz, DMSO-d<sub>6</sub>), b) <sup>13</sup>C NMR (126 MHz, CDCl<sub>3</sub>) spectra of compound 4d

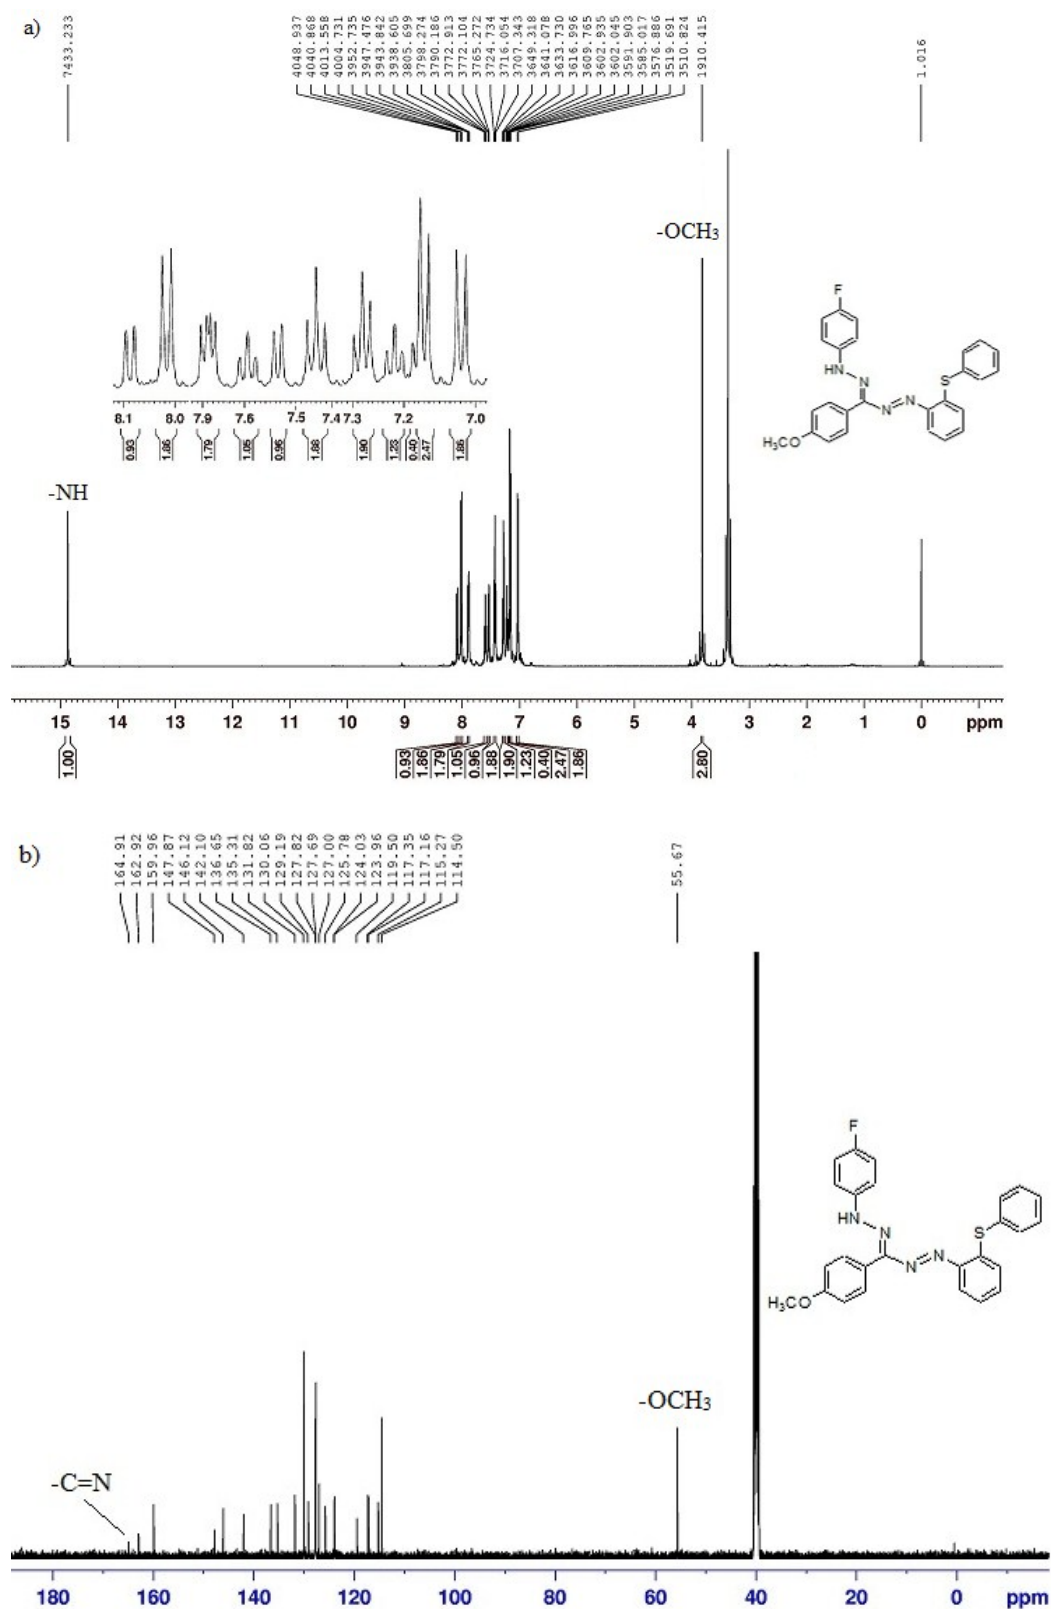

Figure S7 a)  $^1\text{H}$  NMR (500 MHz,  $\text{DMSO-d}_6$ ), b)  $^{13}\text{C}$  NMR (126 MHz,  $\text{DMSO-d}_6$ ) spectra of compound **4e**

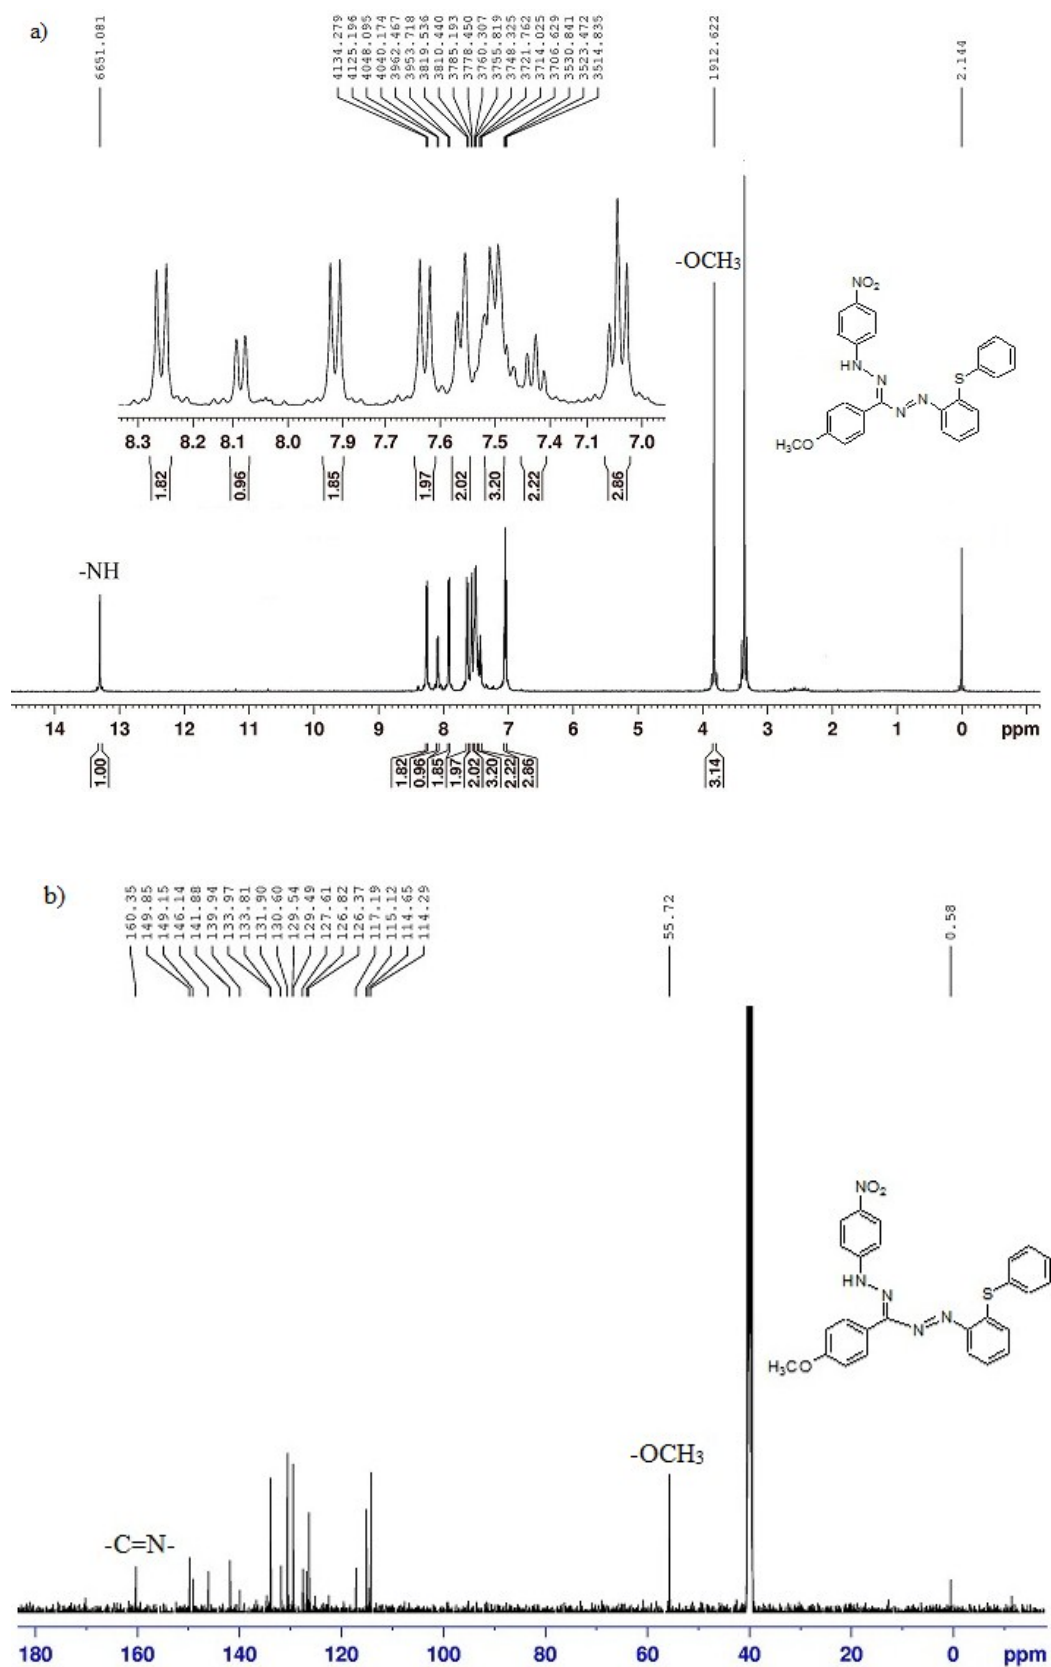

Figure S8 a) <sup>1</sup>H NMR (500 MHz, DMSO-d<sub>6</sub>), b) <sup>13</sup>C NMR (126 MHz, DMSO-d<sub>6</sub>) spectra of compound **4f**



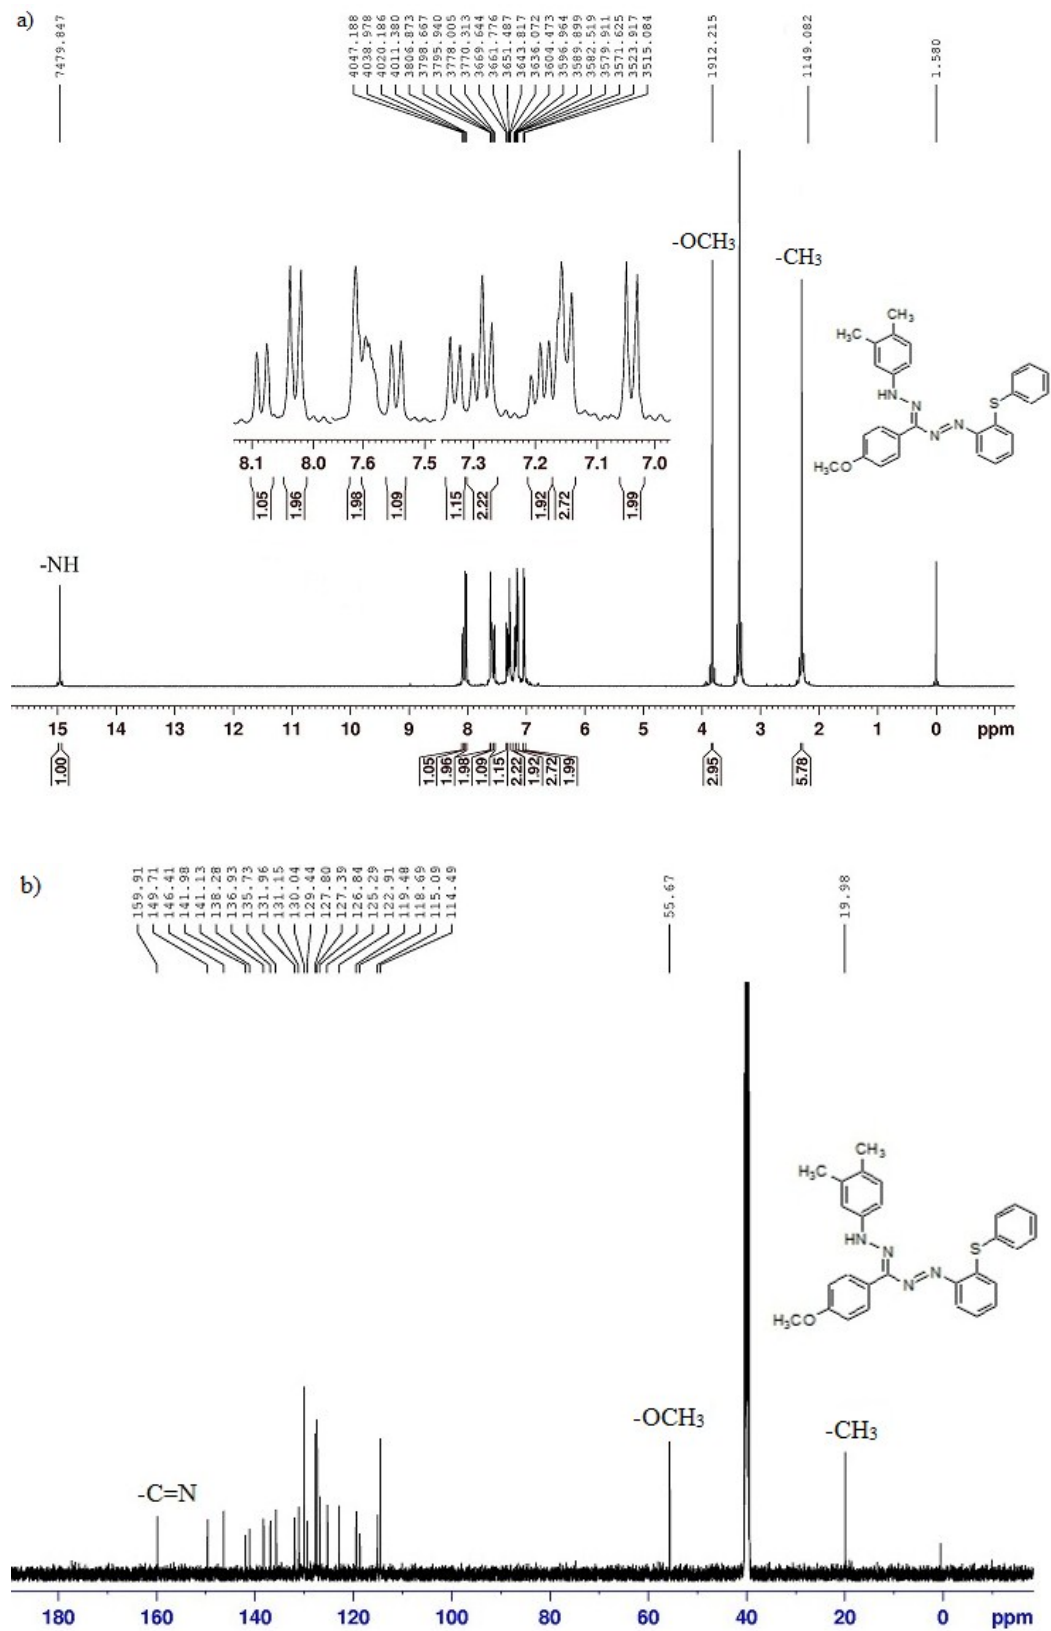

Figure S9 a) <sup>1</sup>H NMR (500 MHz, DMSO-d<sub>6</sub>), b) <sup>13</sup>C NMR (126 MHz, DMSO-d<sub>6</sub>) spectra of compound **4g**

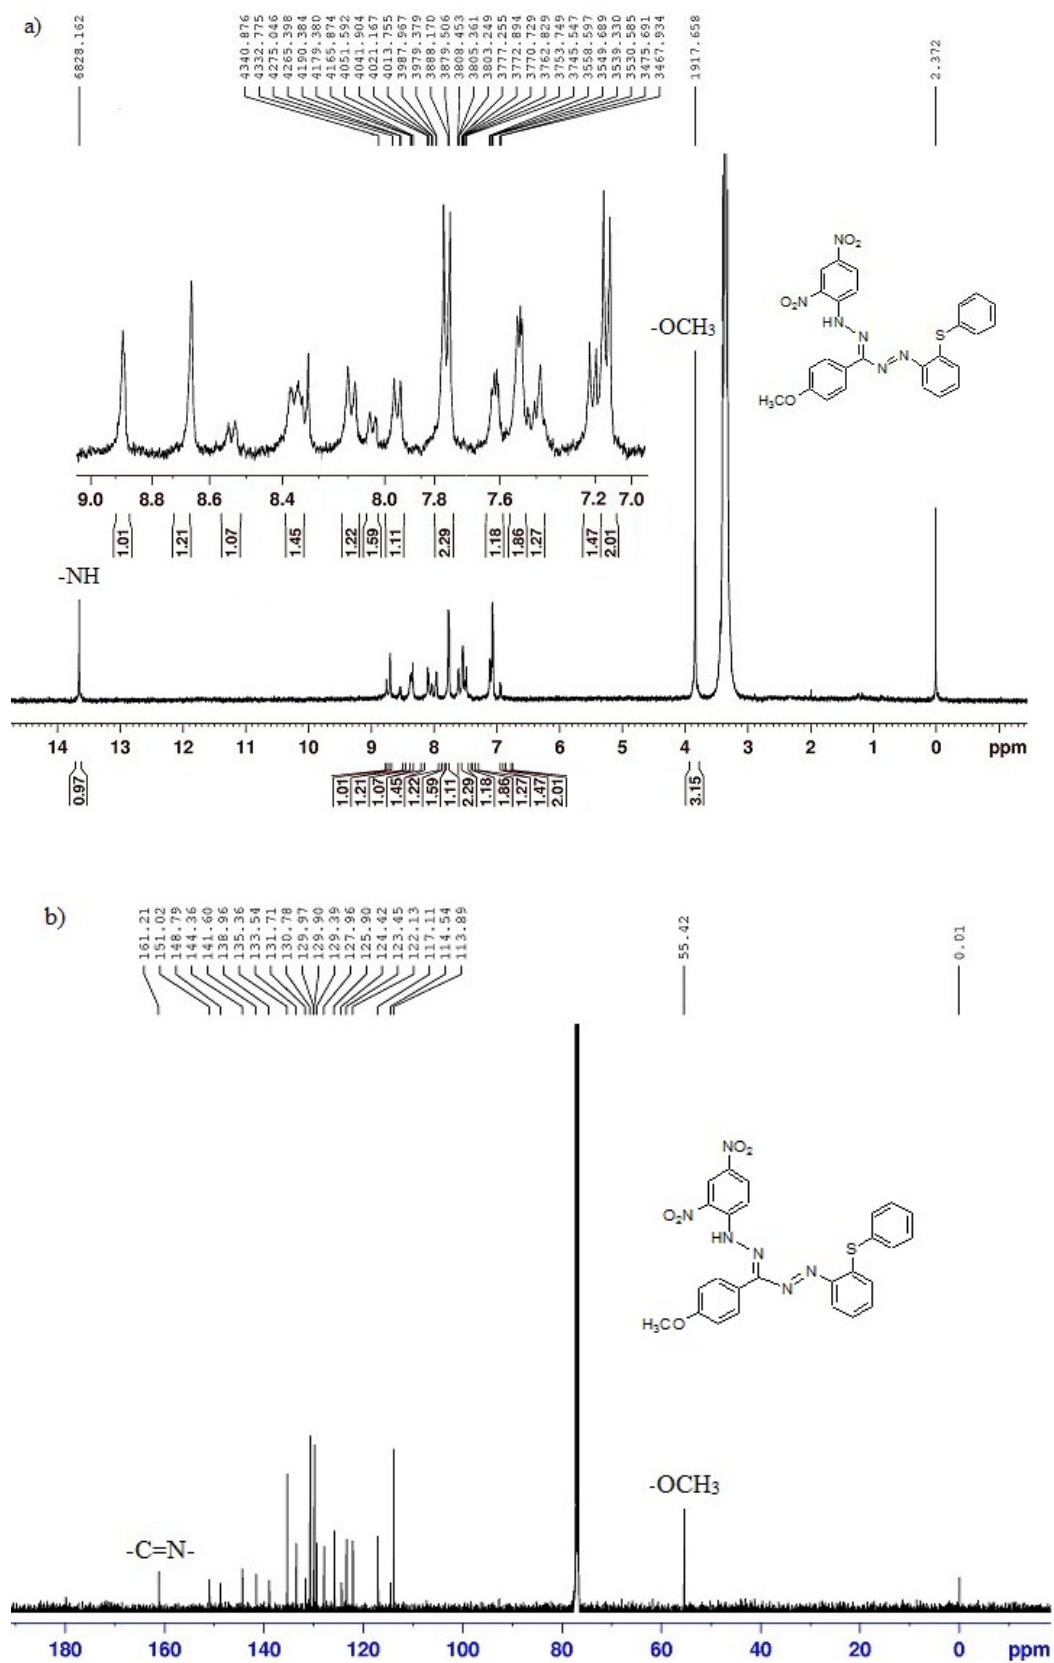

Figure S10 a) <sup>1</sup>H NMR (500 MHz, DMSO-d<sub>6</sub>), b) <sup>13</sup>C NMR (126 MHz, CDCl<sub>3</sub>) spectra of compound 4h

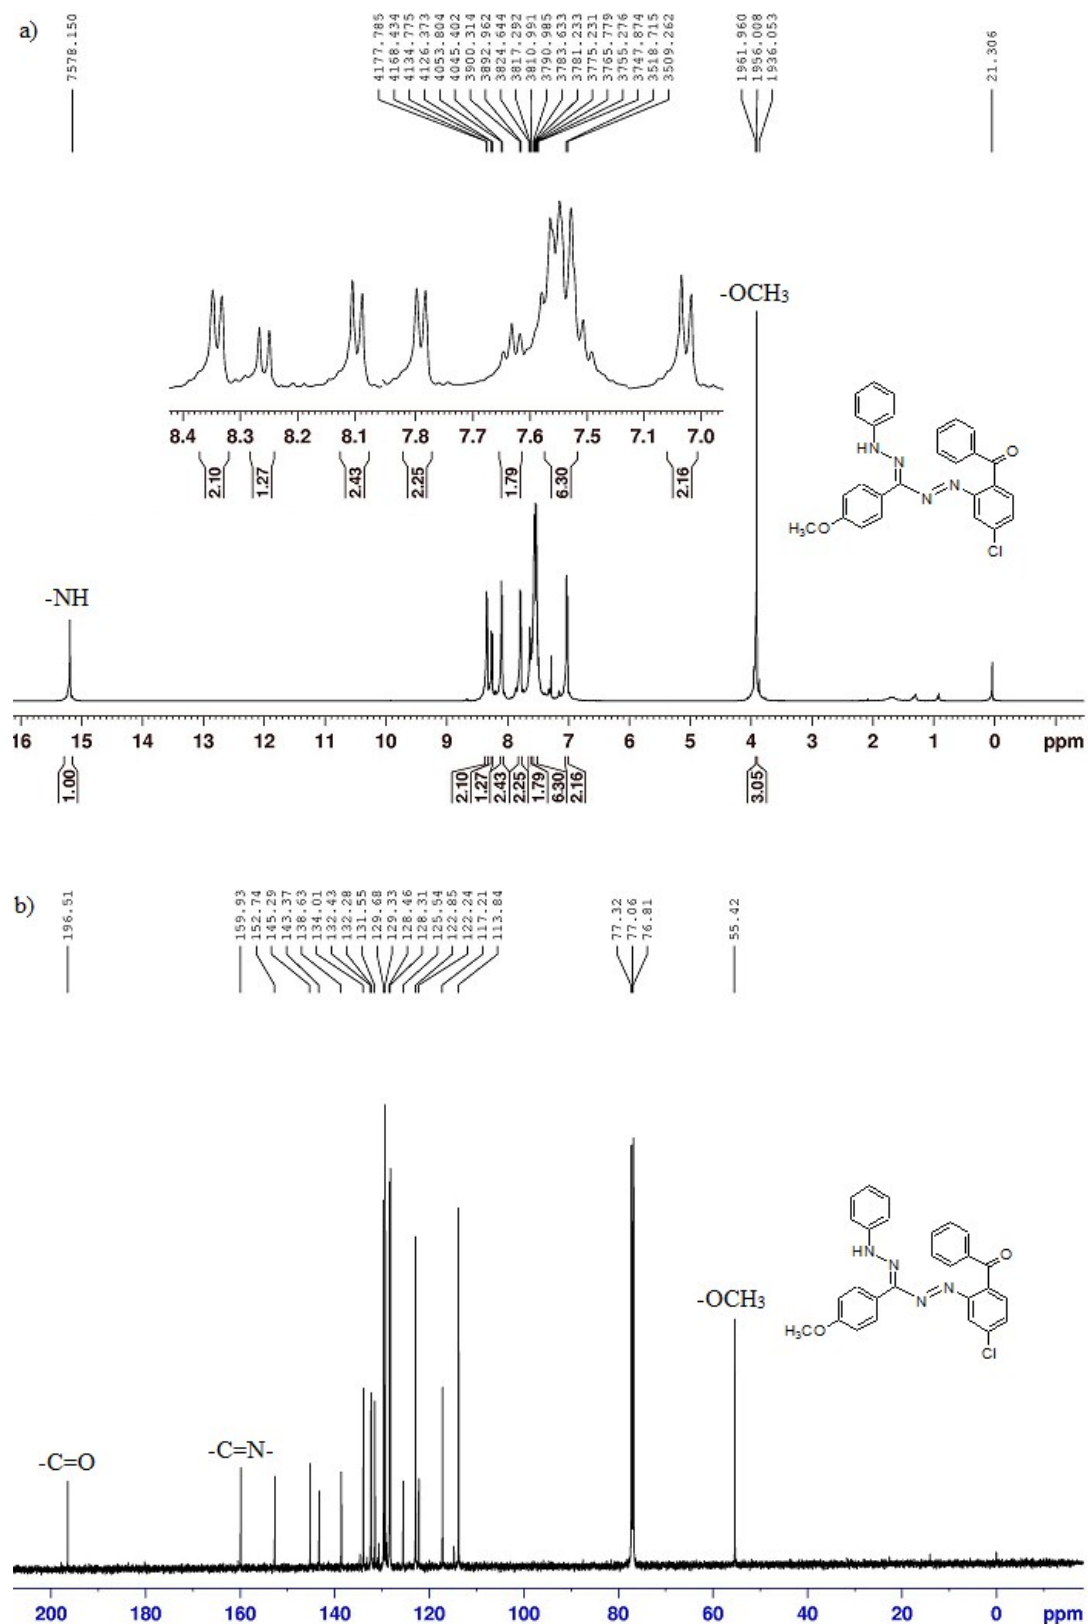

Figure S11 a)  $^1\text{H}$  NMR (500 MHz,  $\text{CDCl}_3$ ), b)  $^{13}\text{C}$  NMR (126 MHz,  $\text{CDCl}_3$ ) spectra of compound 5a

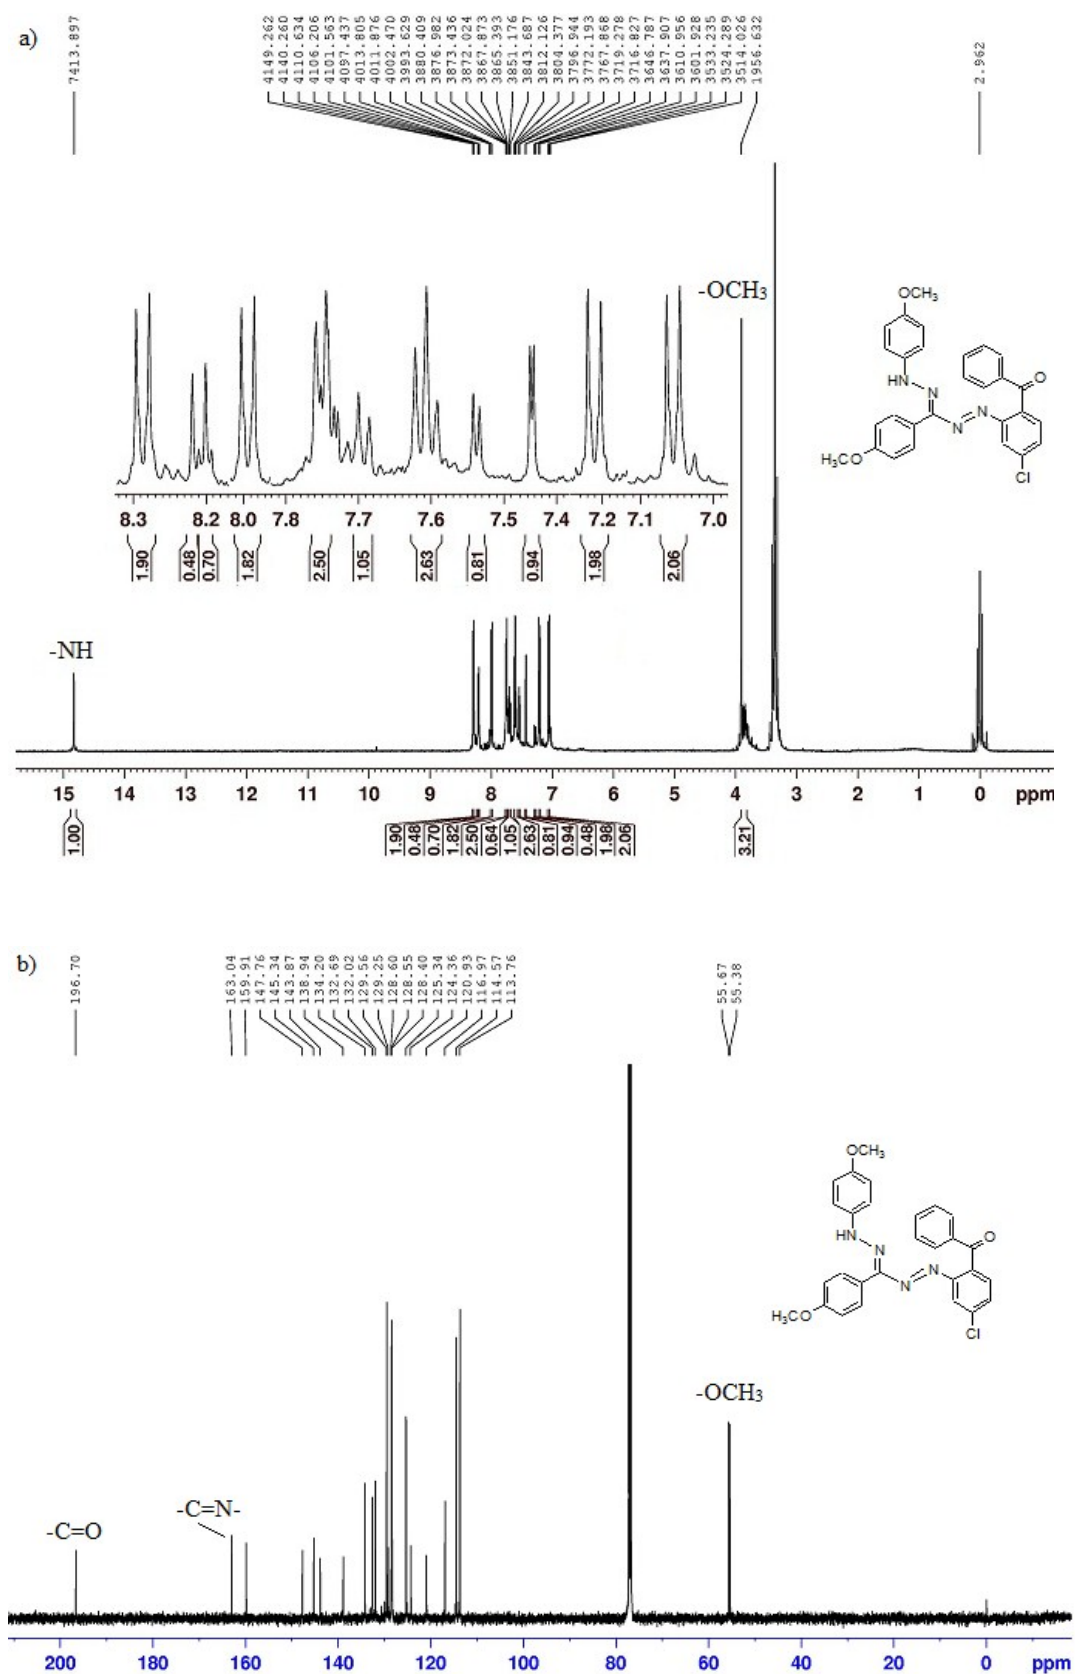

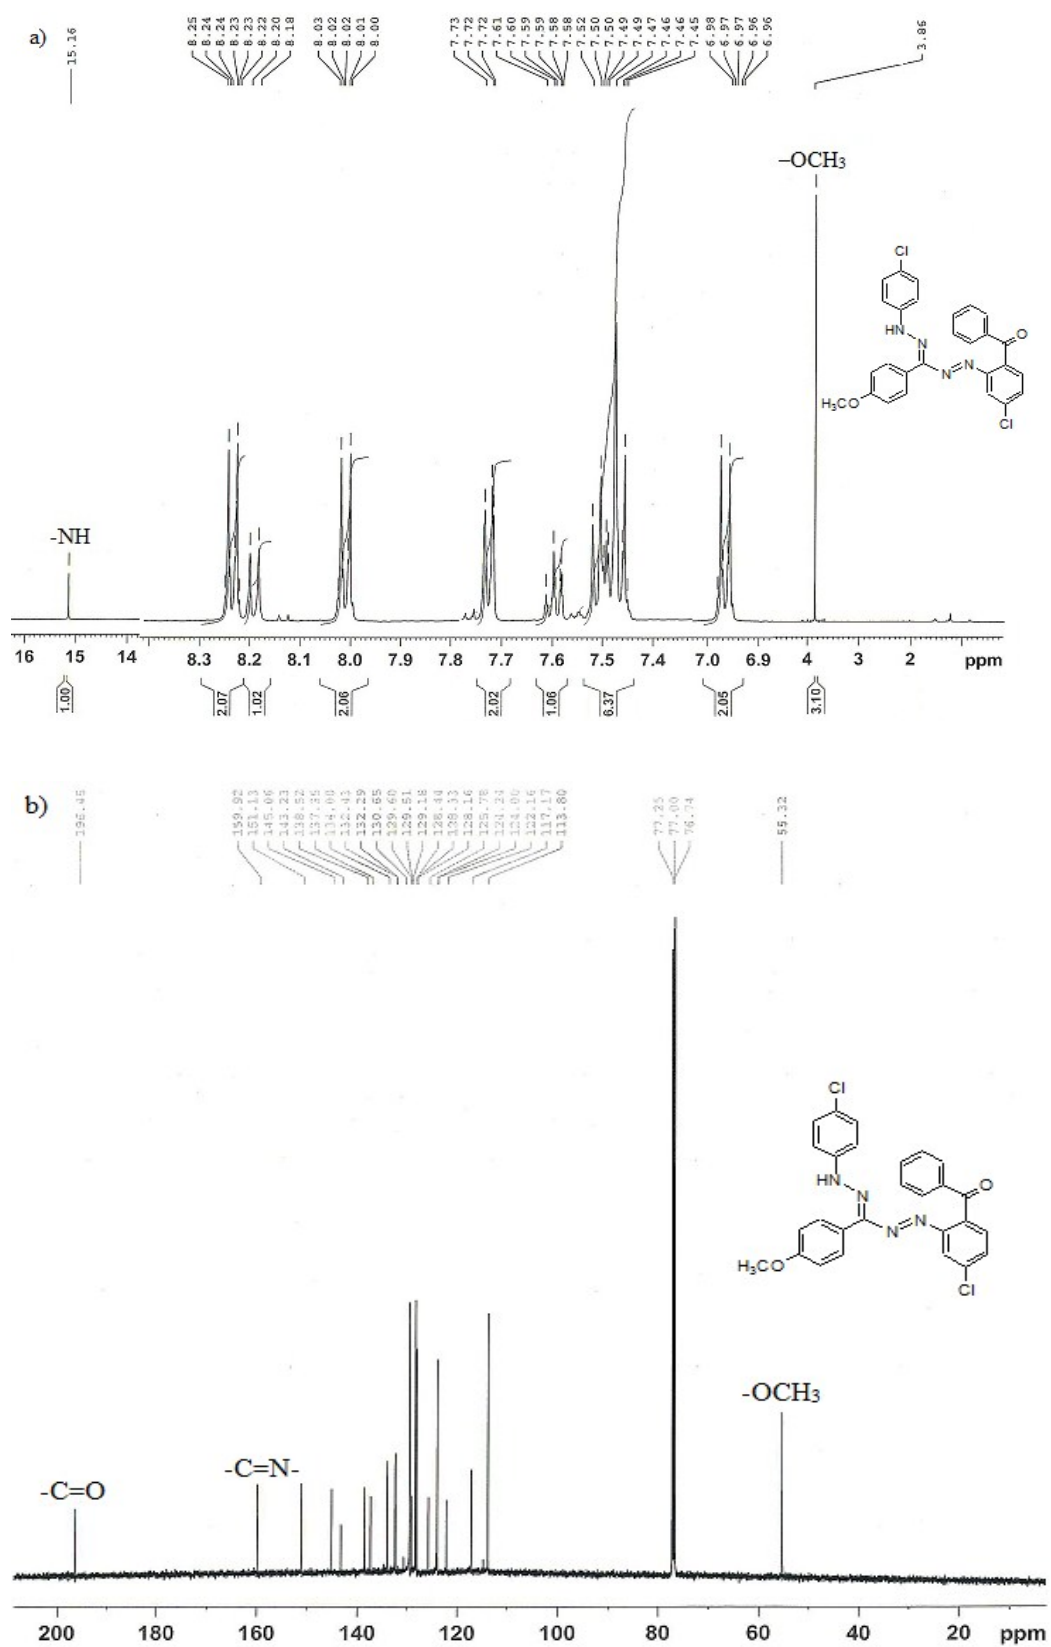

Figure S13 a) <sup>1</sup>H NMR (500 MHz, CDCl<sub>3</sub>), b) <sup>13</sup>C NMR (126 MHz, CDCl<sub>3</sub>) spectra of compound 5c

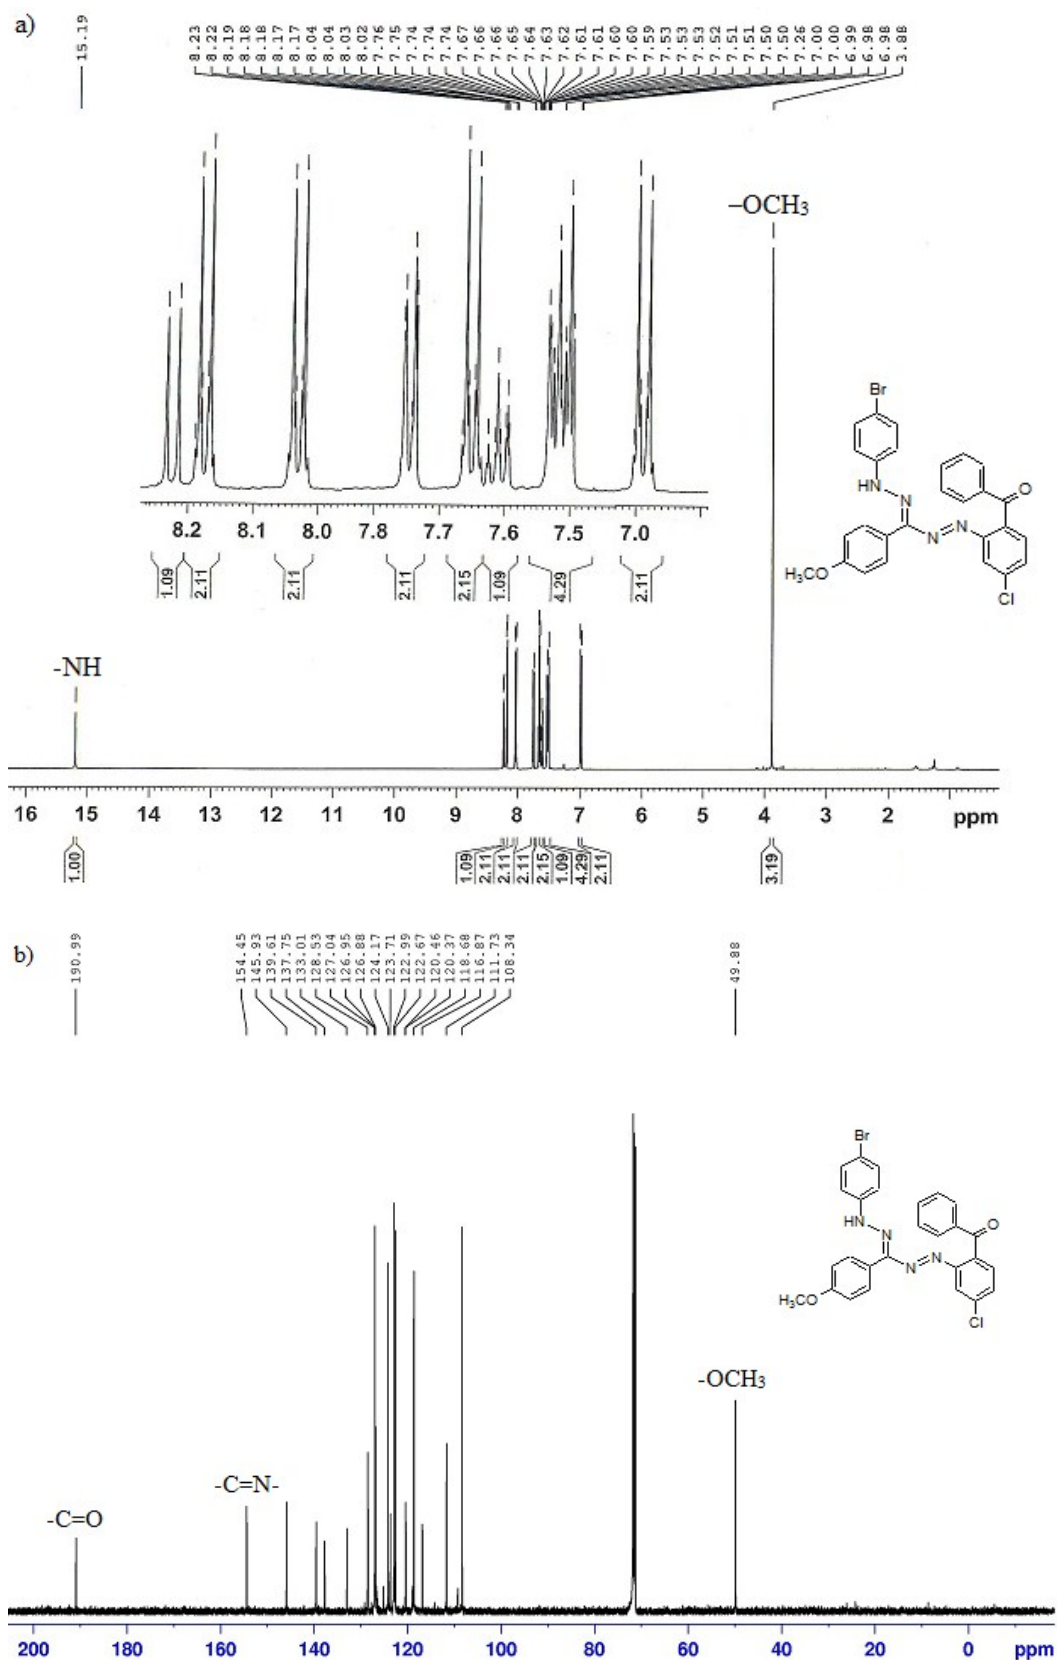

Figure S14 a) <sup>1</sup>H NMR (500 MHz, CDCl<sub>3</sub>), b) <sup>13</sup>C NMR (126 MHz, CDCl<sub>3</sub>) spectra of compound 5d

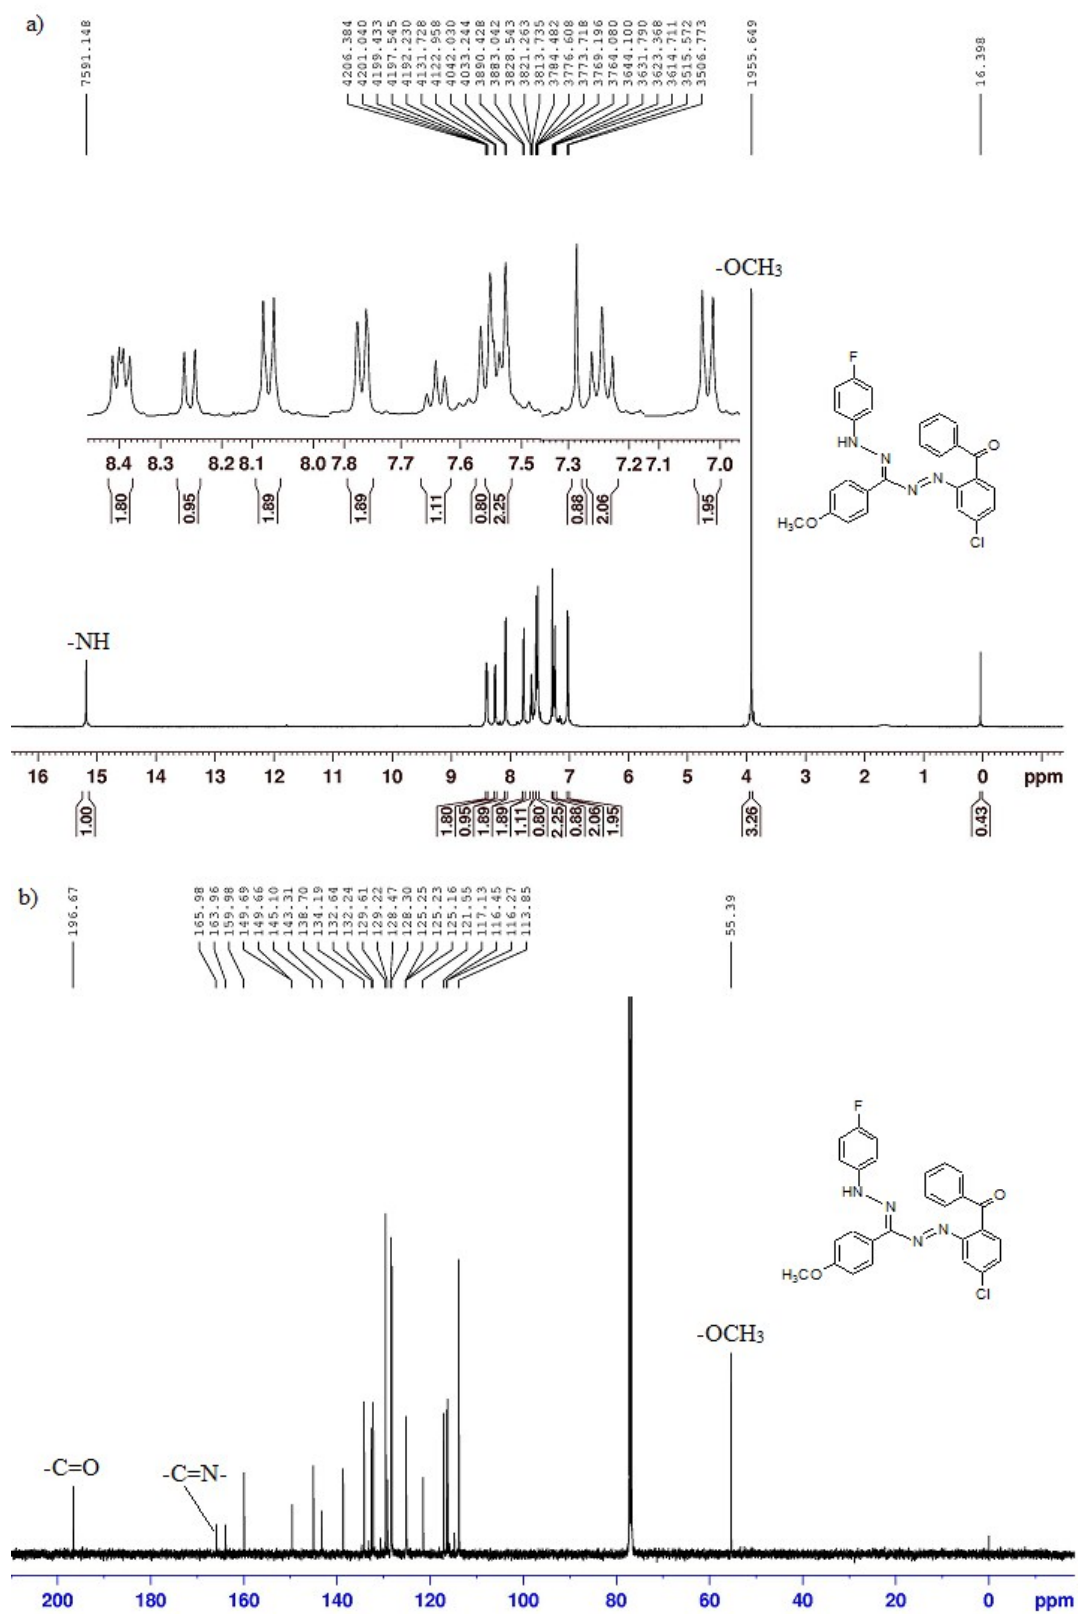

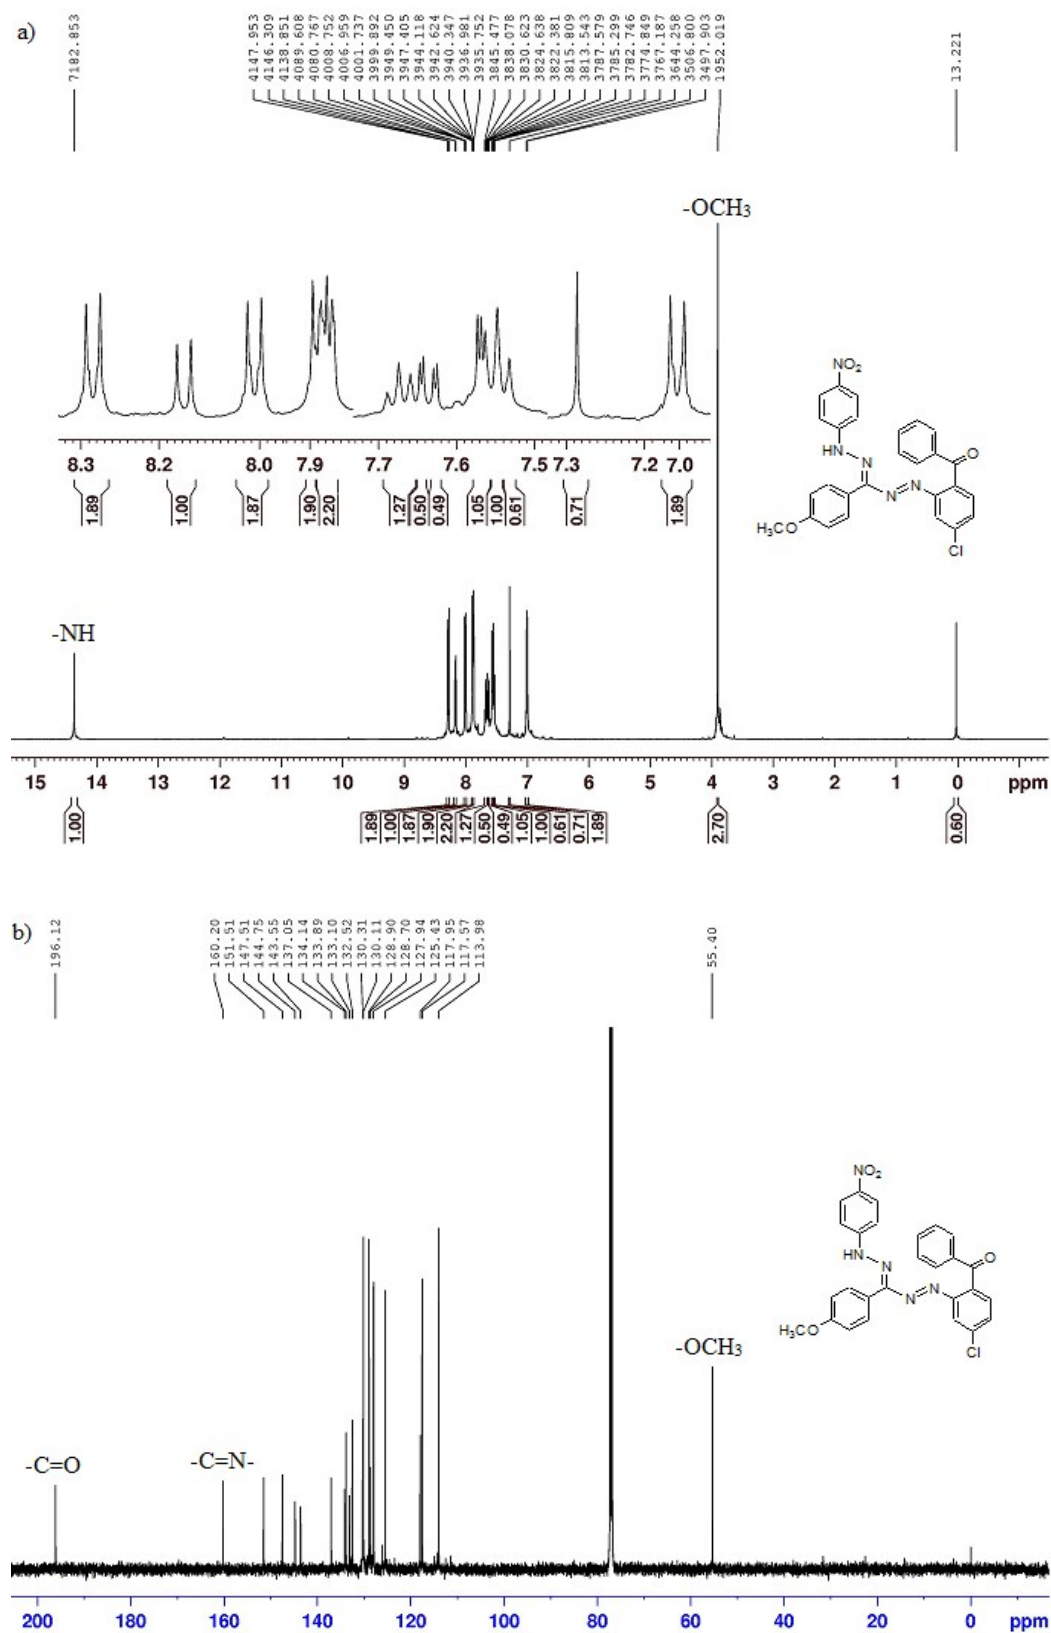



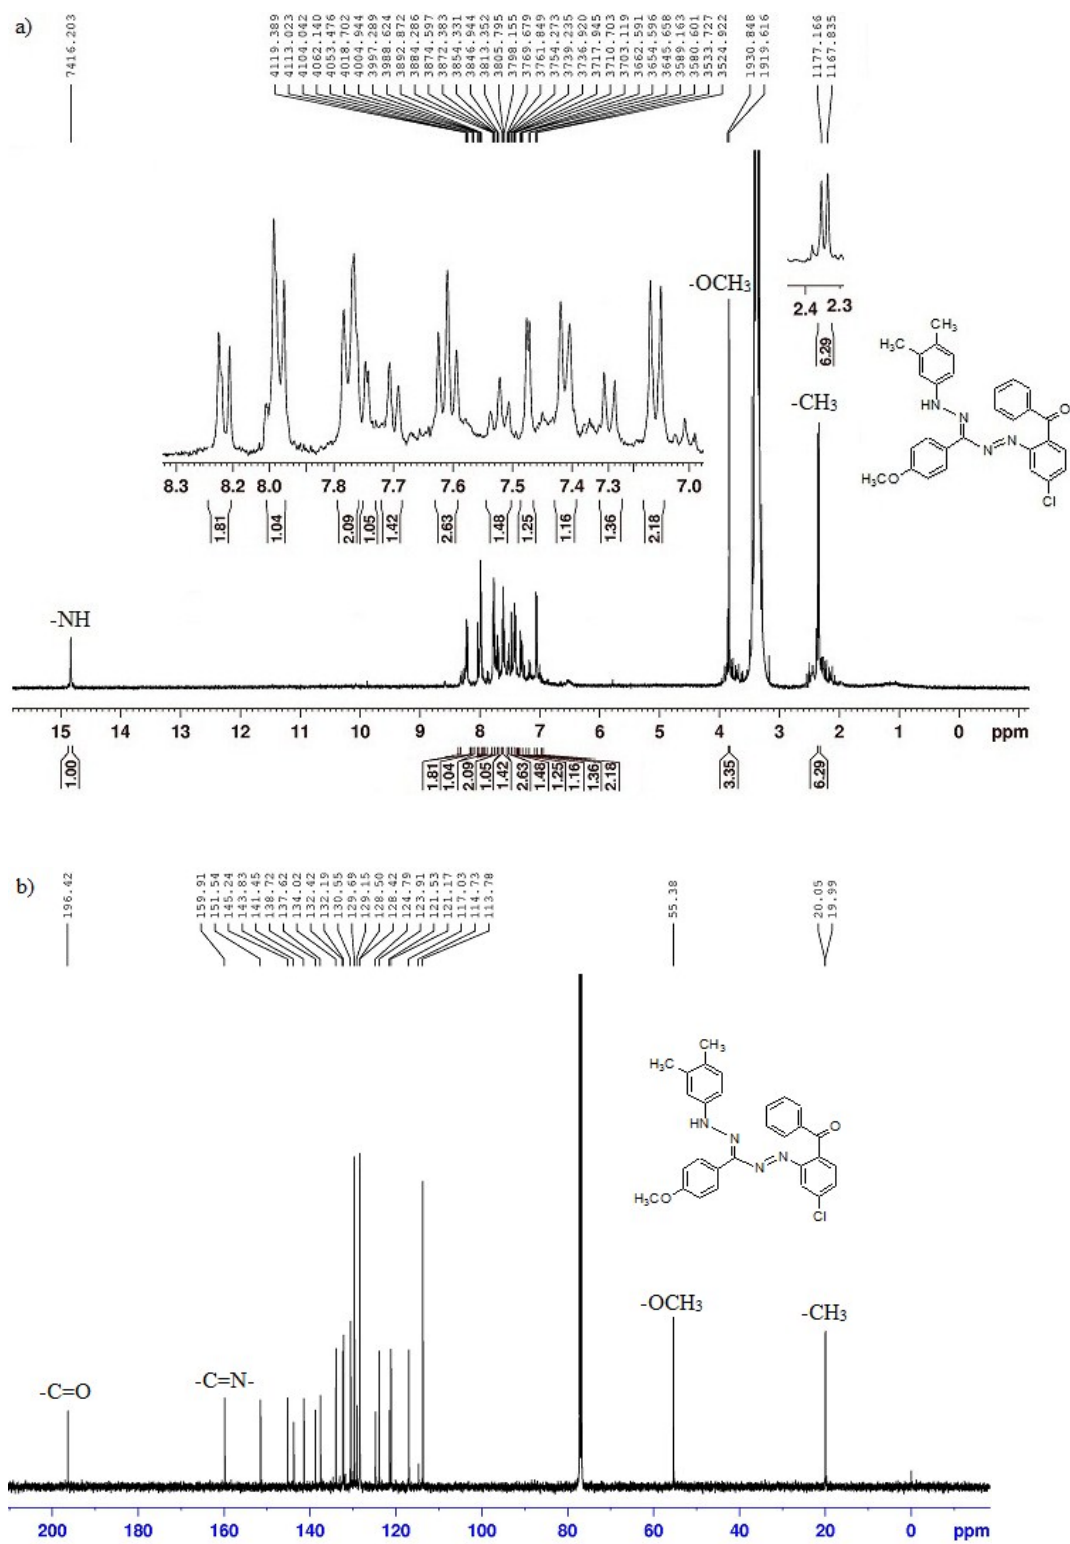

Figure S17 a) <sup>1</sup>H NMR (500 MHz, DMSO-d<sub>6</sub>), b) <sup>13</sup>C NMR (126 MHz, CDCl<sub>3</sub>) spectra of compound **5g**

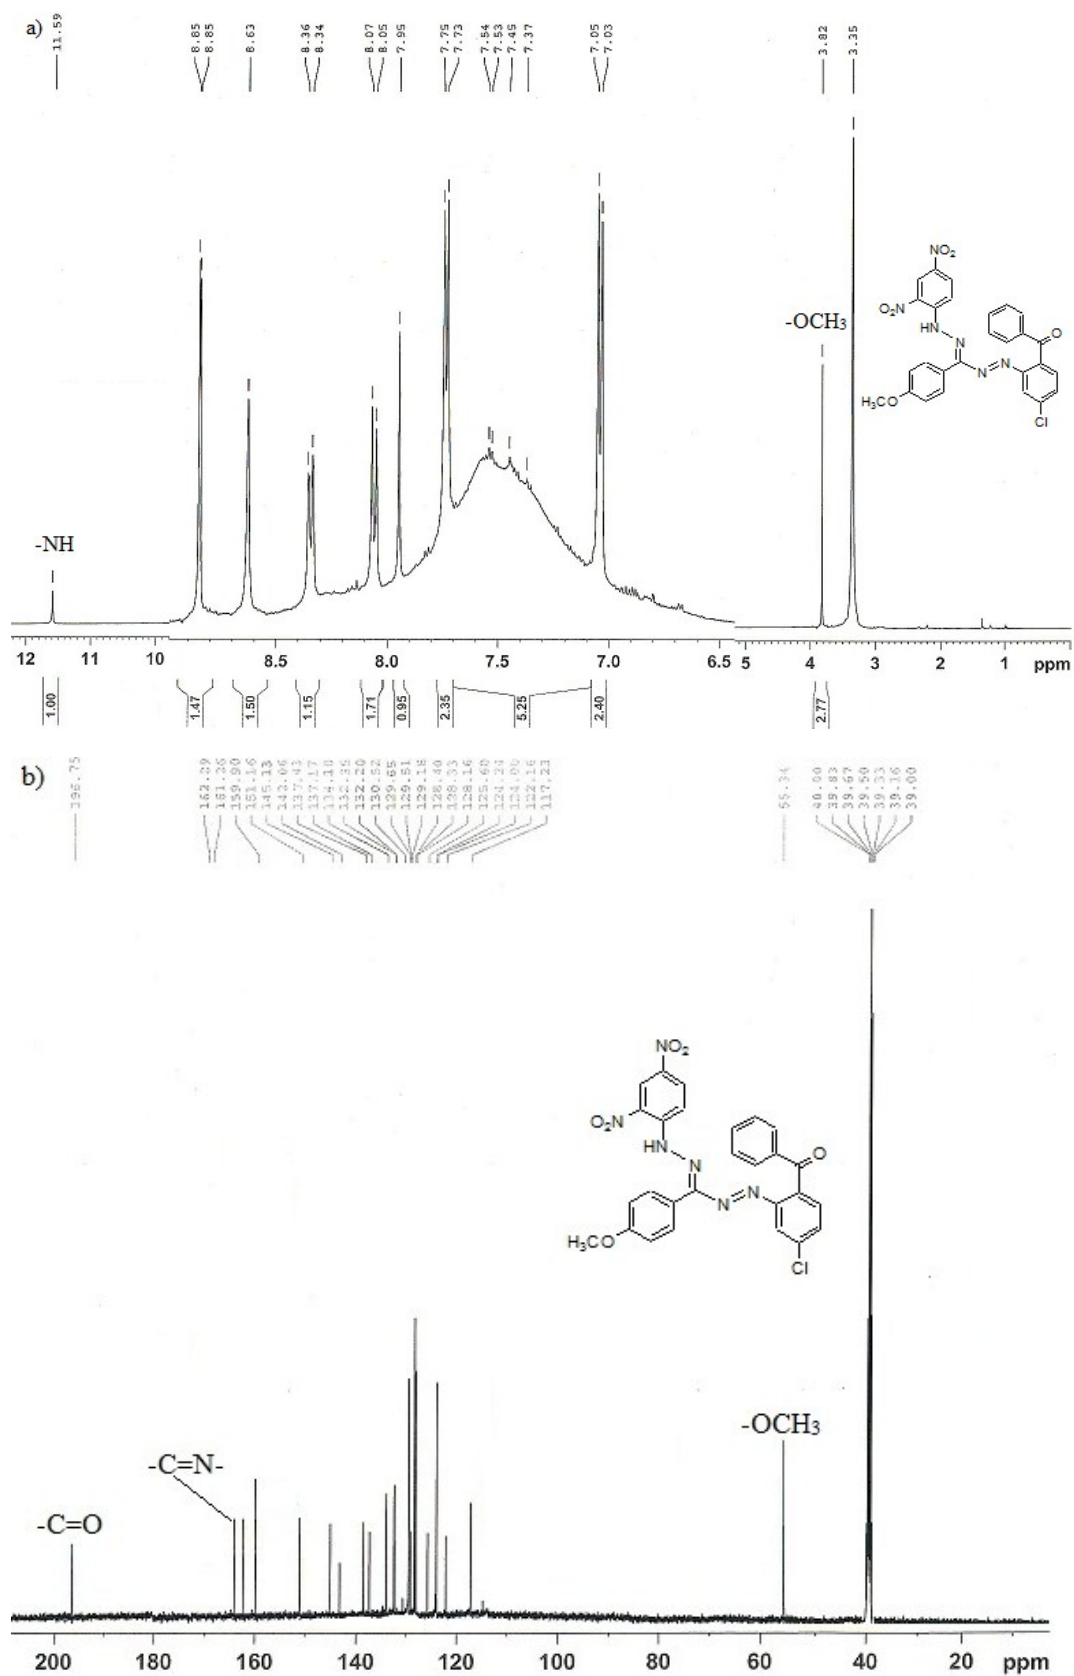

Supplement: c6ra23008c1.pdf [file c6ra23008c1.pdf]
